# Supplementary material for: Osteopathology in Rhinocerotidae from 50 Million Years to the Present
Source: PLoS One. 2016 Feb 3;11(2):e0146221. doi: 10.1371/journal.pone.0146221 (PMC4739690; doi:10.1371/journal.pone.0146221)
Supplement: S1 File — Picture numbers correspond to digital photographs uploaded to Morphobank (project ID: 1238) [27]. Information available with permission from The American Museum of Natural History, The University of Washington Burke Museum, The University of Oregon Museum of Natural and Cultural History, and The University of Texas Jackson School of Geosciences Vertebrate Paleontology Laboratory. (XLSX) [file pone.0146221.s001.xlsx]

## Sheet: Scores
Prefix	PictureNumber	NumberOfPics	SpecimenNumber	Family	Genus	Species	element	SuperElement	Exostoses	Lipping	Abnormal Bone Texture	Cavitation	Foramen Shape	Foramen Size Var.	Articular Surface	Taphonomy	Locality #	Locality Name	Formation	Age	Arthritis?	Notes	Drawer number	Bin
AMNH	164		1645	Hyracodontidae	Hyrachyus	eximius	pelvis	girdle	1	1	1	1	1	1	1	2		Twin Buttes	Bridger	Bridgerian	no		6.026.07	1
AMNH	162		11652	Hyracodontidae	Hyrachyus	eximius	pelvis	girdle	1	1	1	1	1	1	1	2		Little Dry Cr'k	Bridger	Bridgerian	no	two halves of one pelvis…	6.026.03	2
AMNH	162		11652	Hyracodontidae	Hyrachyus	eximius	pelvis	girdle	1	1	1	1	1	1	1	2		Little Dry Cr'k	Bridger	Bridgerian	no	two halves of one pelvis…	6.026.03	3
AMNH	163		11652	Hyracodontidae	Hyrachyus	eximius	pelvis	girdle	1	1	1	1	1	1	1	3		Little Dry Cr'k	Bridger	Bridgerian	no		6.026.03	4
AMNH	190		12364	Hyracodontidae	Hyrachyus	eximius	pelvis	girdle	1	1	1	1	1	1	1	2		30 ft. above upper white stratus	Bridger D5	Bridgerian	no	two halves of one pelvis…	6.024.06
AMNH	191		12364	Hyracodontidae	Hyrachyus	eximius	pelvis	girdle	1	1	1	1	1	1	1	2		30 ft. above upper white stratus	Bridger D5	Bridgerian	no	two halves of one pelvis…	6.024.06
AMNH	159		1621	Hyracodontidae	Hyrachyus	eximius	femur	limb bone	2	1	2	2	3	2	1	3		Bridger Basin	Bridger	Bridgerian	yes	moderate cysting on distal end, medial surface	6.027.07
AMNH	159		1621	Hyracodontidae	Hyrachyus	eximius	tibia	limb bone	2	1	1	1	2	2	1	3		Bridger Basin	Bridger	Bridgerian	yes	moderate on distal end next to articular surface of metapod	6.027.07
AMNH	142		1623	Hyracodontidae	Hyrachyus	eximius	radius	limb bone	2	1	2	1	3	3	1	3		Bridger Basin	Bridger	Bridgerian	yes	remodeling on distal end; same as 1640	6.027.06
AMNH	1351		1638	Hyracodontidae	Hyrachyus	eximius	radius	limb bone	2	1	2	2	3	3	2	3		Cottonwood Corral	Bridger, lower	Bridgerian	yes	minor both ends--none on articular surfaces	6.026.06
AMNH	1351		1638	Hyracodontidae	Hyrachyus	eximius	ulna	limb bone	2	1	2	2	2	2	2	3		Cottonwood Corral	Bridger, lower	Bridgerian	yes		6.026.06
AMNH	140		1640	Hyracodontidae	Hyrachyus	eximius	femur	limb bone	1	1	1	2	1	2	1	4		Bridger Basin	Bridger	Bridgerian	no		6.027.06
AMNH	141		1640	Hyracodontidae	Hyrachyus	eximius	radius	limb bone	2	1	2	2	2	3	1	4		Bridger Basin	Bridger	Bridgerian	yes	remodeling on distal end; same as 1623	6.027.06
AMNH	144		1641	Hyracodontidae	Hyrachyus	eximius	femur	limb bone	1	1	1	2	1	3	1	4		Bridger Basin	Bridger	Bridgerian	Yes	minor on ends, not on artic. Surfaces. prox and distal ends photo'd separately.	6.027.06
AMNH	1375		1644	Hyracodontidae	Hyrachyus	eximius	tibia	limb bone	1	1	2	1	2	2	1	4		Bridger Basin	Bridger	Bridgerian	no		6.027.05
AMNH	1353		1645	Hyracodontidae	Hyrachyus	eximius	tibia	limb bone	1	1	2	1	2	2	1	4		Twin Buttes	Bridger	Bridgerian	yes	minor on distal--none on articular surfaces	6.026.07
AMNH	1356		1646	Hyracodontidae	Hyrachyus	eximius	humerus	limb bone	2	1	1	1	2	3	1	3		Twin Buttes	Bridger	Bridgerian	no	MNI 2+, some juvie bones; plus frags, ribs	6.026.08
AMNH	1356		1646	Hyracodontidae	Hyrachyus	eximius	radius (J)	limb bone	1	1	1	1	1	1	1	2		Twin Buttes	Bridger	Bridgerian	no	MNI 2+, some juvie bones; plus frags, ribs	6.026.08
AMNH	1356		1646	Hyracodontidae	Hyrachyus	eximius	tibia	limb bone	2	1	2	1	2	3	1	3		Twin Buttes	Bridger	Bridgerian	no	MNI 2+, some juvie bones; plus frags, ribs	6.026.08
AMNH	1356		1646	Hyracodontidae	Hyrachyus	eximius	ulna	limb bone	1	2	1	2	1	1	1	1	2	Twin Buttes	Bridger	Bridgerian	no	MNI 2+, some juvie bones; plus frags, ribs	6.026.08
AMNH	1307		1903	Hyracodontidae	Hyrachyus	eximius	ulna	limb bone	1	1	1	1	1	1	1	2		Henry's Fork LT	Bridger, upper white level	Bridgerian	no
AMNH	1336		11693	Hyracodontidae	Hyrachyus	eximius	femur head	limb bone	1	1	2	2	1	1	2	3				Bridgerian
AMNH	1336		11693	Hyracodontidae	Hyrachyus	eximius	radius - broken into two parts	limb bone	1	2	1	1	2	2	1	3				Bridgerian
AMNH	1334		11693	Hyracodontidae	Hyrachyus	eximius	tibia	limb bone	1	1	2	1	1	1	1	3				Bridgerian
AMNH	1301		11707	Hyracodontidae	Hyrachyus	eximius	femur	limb bone	2	1	1	1	2	2	1	4		Henry's Fork LT	Bridger, lower	Bridgerian	no	post-depositional deformation	6.025.02
AMNH	1342		11712	Hyracodontidae	Hyrachyus	eximius	femur	limb bone	1	1	1	1	1	1	1	2		Cat-tail Spring	Bridger D19	Bridgerian	yes		6.026.01
AMNH	1343		11712	Hyracodontidae	Hyrachyus	eximius	tibia	limb bone	1	1	2	1	1	1	1	2		Church Buttes	Bridger, lower	Bridgerian	yes	minor proximal	6.026.01
AMNH	1345		12179	Hyracodontidae	Hyrachyus	eximius	femur	limb bone	2	1	2	2	2	2	1	4				Bridgerian
AMNH	1345		12179	Hyracodontidae	Hyrachyus	eximius	tibia- lower	limb bone	2	1	2	1	1	1	1	4				Bridgerian
AMNH	1345		12179	Hyracodontidae	Hyrachyus	eximius	tibia- upper	limb bone	2	1	1	1	1	1	1	3				Bridgerian
AMNH	1350		12225	Hyracodontidae	Hyrachyus	eximius	humerus	limb bone	1	2	1	1	1	1	1	4		Summer's Dry Cr'k	Briger C4	Bridgerian	no	humerus *rather* robust	6.026.05
AMNH	1349		12225	Hyracodontidae	Hyrachyus	eximius	radius	limb bone	3	1	2	1	2	1	1	4		Summer's Dry Cr'k	Briger C4	Bridgerian	no	humerus *rather* robust	6.026.05
AMNH	1349		12225	Hyracodontidae	Hyrachyus	eximius	ulna	limb bone	2	1	2	1	2	2	1	3		Summer's Dry Cr'k	Briger C5	Bridgerian			6.026.05
AMNH	1347, 1348		12356	Hyracodontidae	Hyrachyus	eximius	radius, ulna, distal humerus (articulated)	limb bone	2	1	2	2	1	1	1	4		Mouth of Summer's Dry Creek	Briger C3	Bridgerian	no	in articulation	6.026.05
AMNH	194		12364	Hyracodontidae	Hyrachyus	eximius	distal tibia	limb bone	1	1	1	2	2	2	1	3		Henry's Fork	Bridger	Bridgerian	yes	cysts and excess growth distally	6.024.07
AMNH	192		12364	Hyracodontidae	Hyrachyus	eximius	femur	limb bone	2	1	2	1	1	1	1	1		Henry's Fork	Bridger	Bridgerian	no	thickening, but no cysts	6.024.07
AMNH	195		12364	Hyracodontidae	Hyrachyus	eximius	fibula	limb bone	2	1	3	1	2	2	1	3		Henry's Fork	Bridger	Bridgerian	no	thickening, but no cysts	6.024.07
AMNH	193		12364	Hyracodontidae	Hyrachyus	eximius	tibia	limb bone	2	1	2	1	1	1	1	2		Henry's Fork	Bridger	Bridgerian	no	thickening, but no cysts	6.024.07
AMNH	1321		12665	Hyracodontidae	Hyrachyus	eximius	femur	limb bone	1	1	1	2	2	2	1	3		Grizzly Buttes	Bridger	Bridgerian
AMNH	1320		12665	Hyracodontidae	Hyrachyus	eximius	tibia	limb bone	2	1	2	1	2	2	1	3		Grizzly Buttes	Bridger	Bridgerian
AMNH	1311, 1312		12673	Hyracodontidae	Hyrachyus	eximius	radius	limb bone	2	1	1	1	1	1	1	2		Henry's Fork LT	Bridger, lower	Bridgerian	Yes	minor on proximal end--not articular surface	6.025.03
AMNH	1311, 1312		12673	Hyracodontidae	Hyrachyus	eximius	ulna	limb bone	1	1	1	1	1	1	1	3		Henry's Fork LT	Bridger, lower	Bridgerian	no		6.025.03
AMNH	184		12675	Hyracodontidae	Hyrachyus	eximius	femur	limb bone	1	1	1	1	1	1	1	3		Black's Fork above Millersville	Bridger B1	Bridgerian	no		6.024.02
AMNH	185		12675	Hyracodontidae	Hyrachyus	eximius	femur	limb bone	1	1	1	2	1	1	2	4		Black's Fork above Millersville	Bridger B1	Bridgerian	no		6.024.02
AMNH	187		12675	Hyracodontidae	Hyrachyus	eximius	fibula	limb bone	1	1	1	1	1	1	1	4		Black's Fork above Millersville	Bridger B1	Bridgerian	yes	minor, on ends near articulations	6.024.02
AMNH	186		12675	Hyracodontidae	Hyrachyus	eximius	tibia	limb bone	1	1	2	1	1	2	1	4		Black's Fork above Millersville	Bridger B1	Bridgerian	no		6.024.02
AMNH	1286, 1288		93050	Hyracodontidae	Hyrachyus	eximius	femur	limb bone	1	1	1	2	3	2	1	4		Henry's Fork LT	Bridger, 50ft below white layer	Bridgerian	Yes	minor on distal end -- not articular surface	6.025.01
AMNH	1290, 1291		93050	Hyracodontidae	Hyrachyus	eximius	radius	limb bone	2	1	2	2	2	2	1	4		Henry's Fork LT	Bridger, 50ft below white layer	Bridgerian	yes	minor on distal end -- not articular surface	6.025.01
AMNH	1293, 1294		93050	Hyracodontidae	Hyrachyus	eximius	ulna	limb bone	2	1	2	1	1	1	1	3		Henry's Fork LT	Bridger, 50ft below white layer	Bridgerian	no		6.025.01
AMNH	1331		93052	Hyracodontidae	Hyrachyus	eximius	femur	limb bone	1	1	1	3	2	2	1	3		Grizzly Buttes	Bridger	Bridgerian	no		6.025.06
AMNH	1332		93058	Hyracodontidae	Hyrachyus	eximius	tibia	limb bone	2	1	1	1	2	2	1	3		Grizzly Buttes	Bridger	Bridgerian	no		6.025.06
AMNH	1303		93059	Hyracodontidae	Hyrachyus	eximius	tibia	limb bone	1	1	1	1	3	2	1	4		Henry's Fork LT	Bridger, upper white level	Bridgerian	no	damage exposes trebecular bone	6.025.03
AMNH	1339, 1340		93060	Hyracodontidae	Hyrachyus	eximius	femur	limb bone	2	1	2	1	2	3	1	4		Bridger Basin	Bridger	Bridgerian
AMNH	1310		93064	Hyracodontidae	Hyrachyus	eximius	femur	limb bone	1	1	1	1	1	1	1	1		Henry's Fork LT	Bridger, upper sandstones	Bridgerian	yes	minor on distal end; femur in small frags	6.025.03
AMNH	1338		93065	Hyracodontidae	Hyrachyus	eximius	tibia	limb bone	2	1	2	2	2	2	1	3		Grizzly Buttes	Bridger	Bridgerian	no		6.025.07
AMNH	1358		93066	Hyracodontidae	Hyrachyus	eximius	tibia	limb bone	2	1	2	2	3	3	1	4				Bridgerian	yes	moderate on prox end	6.027.02
AMNH	1372		1644-A	Hyracodontidae	Hyrachyus	eximius	femur	limb bone	1	1	1	1	1	1	1	4		Bridger Basin	Bridger	Bridgerian
AMNH	1363		5065-a	Hyracodontidae	Hyrachyus	eximius	humerus	limb bone	1	1	1	1	1	1	1	4		Bridger Basin	Bridger	Bridgerian	no	extras from mounted skeleton	6.027.04
AMNH	1363		5065-a	Hyracodontidae	Hyrachyus	eximius	ulna	limb bone	1	1	1	1	1	1	1	3		Bridger Basin	Bridger	Bridgerian	no	extras from mounted skeleton	6.027.04
AMNH	154		1602	Hyracodontidae	Hyrachyus	eximius	metapodial	metapodial	1	1	1	1	1	2	1	3		Bridger Basin	Bridger	Bridgerian	Yes	minor, next to distal articulation. Part of skeleton on display	6.027.07
AMNH	157		1602	Hyracodontidae	Hyrachyus	eximius	metapodial	metapodial	1	1	1	1	2	2	1	2		Bridger Basin	Bridger	Bridgerian
AMNH	155		1602	Hyracodontidae	Hyrachyus	eximius	metapodial - 1 from left	metapodial	1	1	1	1	1	1	1	2		Bridger Basin	Bridger	Bridgerian	no	Part of skeleton on display	6.027.07
AMNH	155		1602	Hyracodontidae	Hyrachyus	eximius	metapodial - 2 from left	metapodial	2	1	1	1	2	1	1	2		Bridger Basin	Bridger	Bridgerian	no	Part of skeleton on display	6.027.07
AMNH	155		1602	Hyracodontidae	Hyrachyus	eximius	metapodial - 3 from left	metapodial	2	1	1	1	1	1	1	2		Bridger Basin	Bridger	Bridgerian	no	Part of skeleton on display	6.027.07
AMNH	155		1602	Hyracodontidae	Hyrachyus	eximius	metapodial - 4 from left	metapodial	2	1	1	1	1	1	1	2		Bridger Basin	Bridger	Bridgerian	no	Part of skeleton on display	6.027.07
AMNH	155		1602	Hyracodontidae	Hyrachyus	eximius	metapodial - 5 from left	metapodial	1	1	1	1	1	1	1	2		Bridger Basin	Bridger	Bridgerian	no	Part of skeleton on display	6.027.07
AMNH	155		1602	Hyracodontidae	Hyrachyus	eximius	metapodial - 6 from left	metapodial	1	1	1	1	1	1	1	2		Bridger Basin	Bridger	Bridgerian	no	Part of skeleton on display	6.027.07
AMNH	1357		1607	Hyracodontidae	Hyrachyus	eximius	metapodial	metapodial	1	1	2	2	1	2	2	2			Bridger	Bridgerian
AMNH	147		1615	Hyracodontidae	Hyrachyus	eximius	metapodial	metapodial	1	2	1	1	1	1	1	3		Bridger Basin	Bridger	Bridgerian	no		6.027.06
AMNH	158		1621	Hyracodontidae	Hyrachyus	eximius	metapodial	metapodial	1	1	1	2	2	2	1	3		Bridger Basin	Bridger	Bridgerian	yes	moderate on distal end next to articular surface of metapod	6.027.07
AMNH	1362		1629	Hyracodontidae	Hyrachyus	eximius	metapodial - row 3	metapodial	2	1	2	1	1	1	1	3		Bridger Basin	Bridger	Bridgerian	yes	minor --not on articular surface	6.027.07
AMNH	1362		1629	Hyracodontidae	Hyrachyus	eximius	metapodial- row 1 left	metapodial	2	1	2	1	1	2	1	3		Bridger Basin	Bridger	Bridgerian	no		6.027.03
AMNH	1362		1629	Hyracodontidae	Hyrachyus	eximius	metapodial- row 1 right	metapodial	2	1	2	1	2	2	1	3		Bridger Basin	Bridger	Bridgerian	yes	minor --not on articular surface	6.027.03
AMNH	1362		1629	Hyracodontidae	Hyrachyus	eximius	metapodial- row 2 left	metapodial	2	1	3	2	3	3	1	3		Bridger Basin	Bridger	Bridgerian	yes	minor --not on articular surface	6.027.04
AMNH	1362		1629	Hyracodontidae	Hyrachyus	eximius	metapodial- row 2 middle	metapodial	2	1	1	1	2	2	1	3		Bridger Basin	Bridger	Bridgerian	yes	minor --not on articular surface	6.027.05
AMNH	1355		1645	Hyracodontidae	Hyrachyus	eximius	metapodial- left	metapodial	2	1	1	1	1	1	1	2		Twin Buttes	Bridger	Bridgerian	yes	minor on distal--none on articular surfaces	6.026.12
AMNH	1355		1645	Hyracodontidae	Hyrachyus	eximius	metapodial- middle	metapodial	1	1	1	1	1	1	1	1		Twin Buttes	Bridger	Bridgerian	yes	minor on distal--none on articular surfaces	6.026.13
AMNH	1355		1645	Hyracodontidae	Hyrachyus	eximius	metapodial- right	metapodial	2	1	1	1	1	2	2	1		Twin Buttes	Bridger	Bridgerian	yes	minor on distal--none on articular surfaces	6.026.14
AMNH	1374		5181	Hyracodontidae	Hyrachyus	eximius	metapodial - row 1 left	metapodial	2	1	2	1	2	2	1	3		Bridger Basin	Bridger	Bridgerian	no		6.027.05
AMNH	1374		5181	Hyracodontidae	Hyrachyus	eximius	metapodial - row 1 right	metapodial	2	1	2	1	1	2	1	4		Bridger Basin	Bridger	Bridgerian	no
AMNH	1374		5181	Hyracodontidae	Hyrachyus	eximius	metapodial - row 2 left	metapodial	1	1	1	1	2	2	1	3		Bridger Basin	Bridger	Bridgerian	no
AMNH	1336		11693	Hyracodontidae	Hyrachyus	eximius	metapodial - middle left	metapodial	1	1	1	1	1	1	1	3				Bridgerian
AMNH	1335		11693	Hyracodontidae	Hyrachyus	eximius	metapodial - row 1	metapodial	1	1	1	2	1	1	1	3				Bridgerian
AMNH	1335		11693	Hyracodontidae	Hyrachyus	eximius	metapodial - row 2	metapodial	1	2	1	1	1	1	1	3				Bridgerian
AMNH	1335		11693	Hyracodontidae	Hyrachyus	eximius	metapodial - row 3	metapodial	1	1	1	1	1	1	1	4				Bridgerian
AMNH	1336		11693	Hyracodontidae	Hyrachyus	eximius	metapodial - row 3 middle left	metapodial	2	1	1	1	1	1	1	1				Bridgerian
AMNH	1335		11693	Hyracodontidae	Hyrachyus	eximius	metapodial - row 4	metapodial	1	1	1	2	1	1	1	4				Bridgerian
AMNH	1336		11693	Hyracodontidae	Hyrachyus	eximius	metapodial - row 4 far left	metapodial	2	1	1	1	1	1	1	3				Bridgerian
AMNH	1336		11693	Hyracodontidae	Hyrachyus	eximius	metapodial - row three middle right	metapodial	1	1	1	1	1	1	1	3				Bridgerian
AMNH	1341		12353	Hyracodontidae	Hyrachyus	eximius	metapodial - left	metapodial	1	1	1	1	1	1	1	2		Cat-tail Spring	Bridger D3	Bridgerian
AMNH	1341		12353	Hyracodontidae	Hyrachyus	eximius	metapodial - middle	metapodial	1	1	1	1	1	1	1	3		Cat-tail Spring	Bridger D4	Bridgerian
AMNH	1341		12353	Hyracodontidae	Hyrachyus	eximius	metapodial - right	metapodial	1	1	1	1	1	1	1	2		Cat-tail Spring	Bridger D5	Bridgerian
AMNH	1306		12368	Hyracodontidae	Hyrachyus	eximius	metapodial - lower	metapodial	2	1	2	1	1	1	1	3		Henry's Fork LT	Bridger, upper white level	Bridgerian	no
AMNH	1306		12368	Hyracodontidae	Hyrachyus	eximius	metapodial - middle	metapodial	1	1	2	1	1	1	1	3		Henry's Fork LT	Bridger, upper white level	Bridgerian	no
AMNH	1306		12368	Hyracodontidae	Hyrachyus	eximius	metapodial - upper	metapodial	2	1	2	2	1	1	1	3		Henry's Fork LT	Bridger, upper white level	Bridgerian	no
AMNH	1319		12665	Hyracodontidae	Hyrachyus	eximius	metapodial- left	metapodial	1	1	1	1	1	1	1	3		Grizzly Buttes	Bridger	Bridgerian
AMNH	1319		12665	Hyracodontidae	Hyrachyus	eximius	metapodial- middle	metapodial	1	1	1	1	1	1	1	2		Grizzly Buttes	Bridger	Bridgerian
AMNH	1319		12665	Hyracodontidae	Hyrachyus	eximius	metapodial- right	metapodial	1	1	1	1	1	1	1	3		Grizzly Buttes	Bridger	Bridgerian
AMNH	1316		12673	Hyracodontidae	Hyrachyus	eximius	metapodial- fifth from left	metapodial	1	1	1	2	1	1	1	3		Henry's Fork LT	Bridger, lower	Bridgerian	no
AMNH	1316		12673	Hyracodontidae	Hyrachyus	eximius	metapodial- first from left	metapodial	1	1	1	1	1	1	1	3		Henry's Fork LT	Bridger, lower	Bridgerian	no		6.025.03
AMNH	1316		12673	Hyracodontidae	Hyrachyus	eximius	metapodial- fourth from left	metapodial	1	1	2	1	1	1	1	3		Henry's Fork LT	Bridger, lower	Bridgerian	no
AMNH	1316		12673	Hyracodontidae	Hyrachyus	eximius	metapodial- second from left	metapodial	2	1	1	1	1	1	1	3		Henry's Fork LT	Bridger, lower	Bridgerian	no
AMNH	1316		12673	Hyracodontidae	Hyrachyus	eximius	metapodial- third from left	metapodial	1	1	2	1	1	1	1	3		Henry's Fork LT	Bridger, lower	Bridgerian	no
AMNH	1324		12674	Hyracodontidae	Hyrachyus	eximius	metapodial- left	metapodial	1	2	1	1	1	1	1	3				Bridgerian
AMNH	1324		12674	Hyracodontidae	Hyrachyus	eximius	metapodial- right	metapodial	1	2	1	1	1	1	1	1				Bridgerian
AMNH	160		12675	Hyracodontidae	Hyrachyus	eximius	metapodial- left lower	metapodial	2	1	2	1	2	2	1	3		Kinney Ranch	Bridger, lower	Bridgerian	Yes	moderate cysting on proximal end of one, minor cysting on distal end of other two	6.027.07
AMNH	160		12675	Hyracodontidae	Hyrachyus	eximius	metapodial- left upper	metapodial	2	1	1	1	2	2	1	3		Kinney Ranch	Bridger, lower	Bridgerian	Yes	moderate cysting on proximal end of one, minor cysting on distal end of other two	6.027.07
AMNH	189		12675	Hyracodontidae	Hyrachyus	eximius	metapodial- middle	metapodial	1	1	1	1	1	1	1	1		Black's Fork above Millersville	Bridger B1	Bridgerian	no		6.024.02
AMNH	160		12675	Hyracodontidae	Hyrachyus	eximius	metapodial- right	metapodial	2	1	2	2	2	2	1	3		Kinney Ranch	Bridger, lower	Bridgerian	Yes	moderate cysting on proximal end of one, minor cysting on distal end of other two	6.027.07
AMNH	189		12675	Hyracodontidae	Hyrachyus	eximius	metapodial- right	metapodial	1	1	1	1	1	1	1	1		Black's Fork above Millersville	Bridger B1	Bridgerian	no		6.024.02
AMNH	188		12765	Hyracodontidae	Hyrachyus	eximius	metapodial- lower	metapodial	1	1	1	1	1	1	1	1		Black's Fork above Millersville	Bridger B1	Bridgerian
AMNH	188		12765	Hyracodontidae	Hyrachyus	eximius	metapodial- middle	metapodial	1	1	1	1	1	1	1	1		Black's Fork above Millersville	Bridger B1	Bridgerian
AMNH	188		12765	Hyracodontidae	Hyrachyus	eximius	metapodial- upper	metapodial	1	1	1	1	2	2	1	1		Black's Fork above Millersville	Bridger B1	Bridgerian
AMNH	1295, 1296		93050	Hyracodontidae	Hyrachyus	eximius	metacarpal	metapodial	1	1	1	1	2	2	1	3		Henry's Fork LT	Bridger, 50ft below white layer	Bridgerian	yes	minor on proximal end--not articular surface	6.025.01
AMNH	1340		93060	Hyracodontidae	Hyrachyus	eximius	metapodial	metapodial	2	1	3	1	1	1	1	3				Bridgerian
AMNH	1337		93061	Hyracodontidae	Hyrachyus	eximius	metapodial	metapodial	1	1	1	1	1	1	1	3		Grizzly Buttes East	Bridger	Bridgerian	no
AMNH	1337		93061	Hyracodontidae	Hyrachyus	eximius	metapodial - left	metapodial	2	1	1	1	1	1	1	2		Grizzly Buttes East	Bridger	Bridgerian	no	plus frags	6.025.07
AMNH	1337		93061	Hyracodontidae	Hyrachyus	eximius	metapodial - middle	metapodial	1	1	1	1	1	1	1	3		Grizzly Buttes East	Bridger	Bridgerian	no
AMNH	1337		93061	Hyracodontidae	Hyrachyus	eximius	metapodial - right	metapodial	1	1	1	1	1	1	1	3		Grizzly Buttes East	Bridger	Bridgerian	no
AMNH	1310		93064	Hyracodontidae	Hyrachyus	eximius	metapodial	metapodial	1	1	1	1	1	1	1	1		Henry's Fork LT	Bridger, upper sandstones	Bridgerian			6.025.03
AMNH	1359		105435	Hyracodontidae	Hyrachyus	modestus	metapodial distal	metapodial	1	1	1	1	1	2	2	3		Tabernacle Butte	Bridger, upper	Bridgerian	yes	distal end, not on articular Surface	6.027.02
AMNH	1372		1644-A	Hyracodontidae	Hyrachyus	eximius	metapodial - lower	metapodial	2	1	1	1	1	1	1	2		Bridger Basin	Bridger	Bridgerian
AMNH	1372		1644-A	Hyracodontidae	Hyrachyus	eximius	metapodial - upper	metapodial	2	1	1	2	1	1	1	2		Bridger Basin	Bridger	Bridgerian	no		6.027.05
AMNH	157		1602	Hyracodontidae	Hyrachyus	eximius	phalanx 1	phalanx	2	1	2	1	1	1	1	2		Bridger Basin	Bridger	Bridgerian
AMNH	157		1602	Hyracodontidae	Hyrachyus	eximius	phalanx 2	phalanx	2	1	2	1	1	1	1	2		Bridger Basin	Bridger	Bridgerian
AMNH	157		1602	Hyracodontidae	Hyrachyus	eximius	phalanx 3	phalanx	2	1	2	1	1	1	2	2		Bridger Basin	Bridger	Bridgerian
AMNH	1361		1626	Hyracodontidae	Hyrachyus	eximius	phalanx	phalanx	2	1	2	2	2	2	1	1		Bridger Basin	Bridger	Bridgerian
AMNH	148		1635	Hyracodontidae	Hyrachyus	eximius	phalanx	phalanx	1	1	1	2	2	2	1	2		Bridger Basin	Bridger	Bridgerian	Yes	minor on lateral surfaces	6.027.06
AMNH	1333		11693	Hyracodontidae	Hyrachyus	eximius	phalanx- row 1 far left	phalanx	1	1	1	1	1	1	1	1				Bridgerian
AMNH	1333		11693	Hyracodontidae	Hyrachyus	eximius	phalanx- row 1 far right	phalanx	1	2	1	1	1	1	1	1				Bridgerian
AMNH	1333		11693	Hyracodontidae	Hyrachyus	eximius	phalanx- row 1 middle left	phalanx	1	1	1	1	1	1	1	2				Bridgerian
AMNH	1333		11693	Hyracodontidae	Hyrachyus	eximius	phalanx- row 1 middle right	phalanx	1	2	1	1	1	1	1	3				Bridgerian
AMNH	1333		11693	Hyracodontidae	Hyrachyus	eximius	phalanx- row 2 far left	phalanx	1	2	1	1	1	1	1	1				Bridgerian
AMNH	1333		11693	Hyracodontidae	Hyrachyus	eximius	phalanx- row 2 far right	phalanx	1	1	1	1	1	1	1	1				Bridgerian
AMNH	1333		11693	Hyracodontidae	Hyrachyus	eximius	phalanx- row 2 middle left	phalanx	1	2	1	1	1	1	1	2				Bridgerian
AMNH	1333		11693	Hyracodontidae	Hyrachyus	eximius	phalanx- row 2 middle right	phalanx	1	1	1	1	2	2	1	2				Bridgerian
AMNH	1333		11693	Hyracodontidae	Hyrachyus	eximius	phalanx- row 3 far left	phalanx	1	1	1	1	1	1	1	1				Bridgerian
AMNH	1333		11693	Hyracodontidae	Hyrachyus	eximius	phalanx- row 3 middle left	phalanx	1	1	1	1	1	1	1	1				Bridgerian
AMNH	1333		11693	Hyracodontidae	Hyrachyus	eximius	phalanx- row 3 middle right	phalanx	1	1	1	1	1	1	1	1				Bridgerian
AMNH	1341		12353	Hyracodontidae	Hyrachyus	eximius	phalanx - row 2 fifth from left	phalanx	1	1	1	1	1	1	1	1		Cat-tail Spring	Bridger D10	Bridgerian
AMNH	1341		12353	Hyracodontidae	Hyrachyus	eximius	phalanx - row 2 fourth from left	phalanx	2	1	2	1	1	1	1	1		Cat-tail Spring	Bridger D9	Bridgerian
AMNH	1341		12353	Hyracodontidae	Hyrachyus	eximius	phalanx - row 3 fourth from left	phalanx	1	1	1	1	1	1	1	1		Cat-tail Spring	Bridger D16	Bridgerian
AMNH	1341		12353	Hyracodontidae	Hyrachyus	eximius	phalanx- row 2 far left	phalanx	2	1	2	1	1	1	1	1		Cat-tail Spring	Bridger D6	Bridgerian
AMNH	1318		12673	Hyracodontidae	Hyrachyus	eximius	phalanx - row 1 far left	phalanx	1	1	1	1	1	1	1	1		Henry's Fork LT	Bridger, lower	Bridgerian	yes	two with moderate signs, phalanges I and III	6.025.03
AMNH	1318		12673	Hyracodontidae	Hyrachyus	eximius	phalanx- row 1 second from left	phalanx	1	2	1	1	1	1	1	2		Henry's Fork LT	Bridger, lower	Bridgerian
AMNH	1318		12673	Hyracodontidae	Hyrachyus	eximius	phalanx- row 1 third from left	phalanx	1	1	1	1	1	1	1	1		Henry's Fork LT	Bridger, lower	Bridgerian
AMNH	1318		12673	Hyracodontidae	Hyrachyus	eximius	phalanx- row 2 fifth from left	phalanx	1	2	1	1	1	1	1	1		Henry's Fork LT	Bridger, lower	Bridgerian
AMNH	1318		12673	Hyracodontidae	Hyrachyus	eximius	phalanx- row 3 far left	phalanx	1	2	1	1	1	1	1	1		Henry's Fork LT	Bridger, lower	Bridgerian
AMNH	1318		12673	Hyracodontidae	Hyrachyus	eximius	phalanx- row 4	phalanx	1	2	1	1	1	1	1	1		Henry's Fork LT	Bridger, lower	Bridgerian
AMNH	189		12675	Hyracodontidae	Hyrachyus	eximius	phalanx- left	phalanx	1	1	1	1	1	1	1	1		Black's Fork above Millersville	Bridger B1	Bridgerian	no		6.024.02
AMNH	1310		93064	Hyracodontidae	Hyrachyus	eximius	phalanx- lower far left	phalanx	2	1	2	1	1	1	1	1		Henry's Fork LT	Bridger, upper sandstones	Bridgerian			6.025.03
AMNH	1310		93064	Hyracodontidae	Hyrachyus	eximius	phalanx- lower second left	phalanx	1	1	1	1	1	1	1	1		Henry's Fork LT	Bridger, upper sandstones	Bridgerian			6.025.03
AMNH	1310		93064	Hyracodontidae	Hyrachyus	eximius	phalanx- upper far left	phalanx	1	1	1	1	1	1	1	1		Henry's Fork LT	Bridger, upper sandstones	Bridgerian	yes	minor overgrowths; barely any. 9 elements	6.025.03
AMNH	1310		93064	Hyracodontidae	Hyrachyus	eximius	phalanx- upper second left	phalanx	2	1	2	1	1	1	1	1		Henry's Fork LT	Bridger, upper sandstones	Bridgerian			6.025.03
AMNH	1373		1644-A	Hyracodontidae	Hyrachyus	eximius	phalanx - left	phalanx	1	1	1	1	1	1	1	1		Bridger Basin	Bridger	Bridgerian	yes	s'mores effect on podials	6.027.05
AMNH	1372		1644-A	Hyracodontidae	Hyrachyus	eximius	phalanx - row 1 left	phalanx	2	2	1	1	1	1	1	1		Bridger Basin	Bridger	Bridgerian
AMNH	1372		1644-A	Hyracodontidae	Hyrachyus	eximius	phalanx - row 3	phalanx	2	1	1	1	1	2	1	1		Bridger Basin	Bridger	Bridgerian
AMNH	1372		1644-A	Hyracodontidae	Hyrachyus	eximius	phalanx 3	phalanx	1	1	1	1	1	2	1	1		Bridger Basin	Bridger	Bridgerian
AMNH	157		1602	Hyracodontidae	Hyrachyus	eximius	astragalus	podial	1	1	2	1	1	1	1	2		Bridger Basin	Bridger	Bridgerian
AMNH	1357		1607	Hyracodontidae	Hyrachyus	eximius	astragalus	podial	2	1	2	2	3	2	1	3			Bridger	Bridgerian
AMNH	1357		1607	Hyracodontidae	Hyrachyus	eximius	podial	podial	2	1	2	2	2	2	1	3			Bridger	Bridgerian
AMNH	146		1615	Hyracodontidae	Hyrachyus	eximius	astragalus on left	podial	2	1	2	2	1	2	2	2		Bridger Basin	Bridger	Bridgerian	yes	minor subchondral cysting on lateral surfaces	6.027.06
AMNH	146		1615	Hyracodontidae	Hyrachyus	eximius	astragalus on right	podial	2	1	2	1	1	1	1	2		Bridger Basin	Bridger	Bridgerian	yes	minor subchondral cysting on lateral surfaces	6.027.06
AMNH	147		1615	Hyracodontidae	Hyrachyus	eximius	calcaneum	podial	1	1	2	1	1	1	1	3		Bridger Basin	Bridger	Bridgerian	yes	minor subchondral cysting on lateral surfaces	6.027.06
AMNH	146		1615	Hyracodontidae	Hyrachyus	eximius	podial middle bottom	podial	2	1	1	1	1	1	1	1		Bridger Basin	Bridger	Bridgerian	yes	minor subchondral cysting on lateral surfaces	6.027.06
AMNH	146		1615	Hyracodontidae	Hyrachyus	eximius	podial middle top	podial	2	1	2	1	1	1	1	1		Bridger Basin	Bridger	Bridgerian	yes	minor subchondral cysting on lateral surfaces	6.027.06
AMNH	158		1621	Hyracodontidae	Hyrachyus	eximius	calcaneum	podial	2	1	2	2	2	3	1	2		Bridger Basin	Bridger	Bridgerian	yes	moderate on distal end next to articular surface of metapod	6.027.07
AMNH	1361		1626	Hyracodontidae	Hyrachyus	eximius	podial - lower	podial	2	1	2	1	2	2	1	4		Bridger Basin	Bridger	Bridgerian
AMNH	1361		1626	Hyracodontidae	Hyrachyus	eximius	podial - upper	podial	1	1	2	1	1	2	1	4		Bridger Basin	Bridger	Bridgerian	no		6.027.03
AMNH	1362		1629	Hyracodontidae	Hyrachyus	eximius	podial- row 2 right	podial	1	1	1	1	1	1	1	1		Bridger Basin	Bridger	Bridgerian	yes	minor --not on articular surface	6.027.06
AMNH	148		1635	Hyracodontidae	Hyrachyus	eximius	astragalus - left	podial	1	1	2	2	2	2	2	3		Bridger Basin	Bridger	Bridgerian	Yes	minor on lateral surfaces	6.027.06
AMNH	148		1635	Hyracodontidae	Hyrachyus	eximius	astragalus- middle	podial	1	1	2	2	2	2	2	2		Bridger Basin	Bridger	Bridgerian	Yes	minor on lateral surfaces	6.027.06
AMNH	1375		1644	Hyracodontidae	Hyrachyus	eximius	calcaneum	podial	2	1	2	2	3	2	1	3		Bridger Basin	Bridger	Bridgerian	no		6.027.05
AMNH	1299, 1300		1644	Hyracodontidae	Hyrachyus	eximius	calcaneum	podial	2	2	2	1	2	2	1	2		Bridger Basin	Bridger	Bridgerian	yes	minor on both ends	6.027.05
AMNH	1375		1644	Hyracodontidae	Hyrachyus	eximius	podial- lower left	podial	1	1	1	1	2	2	1	1		Bridger Basin	Bridger	Bridgerian	no		6.027.05
AMNH	1375		1644	Hyracodontidae	Hyrachyus	eximius	podial- lower middle	podial	1	1	1	1	1	2	1	3		Bridger Basin	Bridger	Bridgerian	no		6.027.05
AMNH	1355		1645	Hyracodontidae	Hyrachyus	eximius	astragalus	podial	1	1	1	1	1	1	1	1		Twin Buttes	Bridger	Bridgerian	yes	minor on distal--none on articular surfaces	6.026.11
AMNH	1355		1645	Hyracodontidae	Hyrachyus	eximius	calcaneum	podial	1	1	1	1	1	1	1	1		Twin Buttes	Bridger	Bridgerian	yes	minor on distal--none on articular surfaces	6.026.10
AMNH	1355		1645	Hyracodontidae	Hyrachyus	eximius	podial - left upper	podial	2	2	3	1	1	2	1	1		Twin Buttes	Bridger	Bridgerian	yes	minor on distal--none on articular surfaces	6.026.08
AMNH	1355		1645	Hyracodontidae	Hyrachyus	eximius	podial- left lower	podial	2	1	2	1	1	1	1	1		Twin Buttes	Bridger	Bridgerian	yes	minor on distal--none on articular surfaces	6.026.09
AMNH	1329		5056	Hyracodontidae	Hyrachyus	eximius	astragalus	podial	1	1	1	1	2	2	2	2		Grizzly Buttes	Bridger B2	Bridgerian	yes		6.025.06
AMNH	1329		5056	Hyracodontidae	Hyrachyus	eximius	calcaneum	podial	1	1	1	1	2	3	1	3		Grizzly Buttes	Bridger B2	Bridgerian	yes		6.025.06
AMNH	1330		5056	Hyracodontidae	Hyrachyus	eximius	navicular	podial	2	1	2	2	2	2	1	1		Grizzly Buttes	Bridger B2	Bridgerian	yes	s'mores effect	6.025.06
AMNH	1329		5056	Hyracodontidae	Hyrachyus	eximius	podial- left	podial	1	1	1	1	1	1	1	1		Grizzly Buttes	Bridger B2	Bridgerian	yes		6.025.06
AMNH	1329		5056	Hyracodontidae	Hyrachyus	eximius	podial- middle	podial	1	1	1	1	2	2	1	1		Grizzly Buttes	Bridger B2	Bridgerian	yes		6.025.06
AMNH	1329		5056	Hyracodontidae	Hyrachyus	eximius	podial- right	podial	1	1	1	1	1	1	1	1		Grizzly Buttes	Bridger B2	Bridgerian	yes		6.025.06
AMNH	1374		5181	Hyracodontidae	Hyrachyus	eximius	magnum - row 2 right	podial	1	1	1	2	2	2	1	4		Bridger Basin	Bridger	Bridgerian
AMNH	153		5196	Hyracodontidae	Hyrachyus	eximius	astragalus	podial	1	1	1	2	2	1	1	3		Bridger Basin	Bridger	Bridgerian	Yes	minor, not on articular surface	6.027.06
AMNH	153		5196	Hyracodontidae	Hyrachyus	eximius	calcaneum	podial	1	1	2	1	2	2	2	3		Bridger Basin	Bridger	Bridgerian	Yes	minor, not on articular surface	6.027.07
AMNH	1336		11693	Hyracodontidae	Hyrachyus	eximius	podial - row 1 middle	podial	1	1	1	1	1	1	1	1				Bridgerian
AMNH	1336		11693	Hyracodontidae	Hyrachyus	eximius	podial - row 1 right	podial	2	1	2	1	1	2	1	1				Bridgerian
AMNH	1336		11693	Hyracodontidae	Hyrachyus	eximius	podial - row 2 far right	podial	1	1	1	1	1	1	1	1				Bridgerian
AMNH	1336		11693	Hyracodontidae	Hyrachyus	eximius	podial - row 2 middle right	podial	1	1	1	1	1	2	1	1				Bridgerian
AMNH	1336		11693	Hyracodontidae	Hyrachyus	eximius	podial - row 3 far left	podial	1	1	1	1	1	1	1	1				Bridgerian
AMNH	1336		11693	Hyracodontidae	Hyrachyus	eximius	podial - row 3 far right	podial	1	1	1	1	1	1	1	1				Bridgerian
AMNH	1336		11693	Hyracodontidae	Hyrachyus	eximius	podial -row 1 left	podial	1	1	1	1	1	1	1	1				Bridgerian
AMNH	1336		11693	Hyracodontidae	Hyrachyus	eximius	podial- row 2 far left	podial	1	1	1	1	1	1	1	1				Bridgerian
AMNH	1336		11693	Hyracodontidae	Hyrachyus	eximius	podial- row 2 middle left	podial	1	1	1	1	1	1	1	1				Bridgerian
AMNH	1344		11712	Hyracodontidae	Hyrachyus	eximius	astragalus- left	podial	2	1	2	1	2	2	1	1		Church Buttes	Bridger, lower	Bridgerian	no	at least two individuals (2 left astrags)	6.026.01
AMNH	1344		11712	Hyracodontidae	Hyrachyus	eximius	astragalus- middle	podial	2	1	2	2	2	2	1	1		Church Buttes	Bridger, lower	Bridgerian
AMNH	1344		11712	Hyracodontidae	Hyrachyus	eximius	calcaneum	podial	1	1	1	1	1	1	1	2		Church Buttes	Bridger, lower	Bridgerian
AMNH	1346		12179	Hyracodontidae	Hyrachyus	eximius	astragalus	podial	2	1	2	2	2	3	2	3		Mid. Cottonwood Cr.	Briger B3	Bridgerian	yes	on both ends--not on articular surface	6.026.02
AMNH	1346		12179	Hyracodontidae	Hyrachyus	eximius	calcaneum	podial	2	1	2	2	1	3	1	3		Mid. Cottonwood Cr.	Briger B3	Bridgerian	yes	on both ends--not on articular surface	6.026.02
AMNH	1349		12225	Hyracodontidae	Hyrachyus	eximius	podial	podial	2	1	2	2	1	1	1	1		Summer's Dry Cr'k	Briger C6	Bridgerian
AMNH	1341		12353	Hyracodontidae	Hyrachyus	eximius	calcaneum	podial	1	1	1	1	1	1	1	2		Cat-tail Spring	Bridger D2	Bridgerian	no	plus frags	6.026.01
AMNH	1341		12353	Hyracodontidae	Hyrachyus	eximius	podial - row 2 second from left	podial	1	1	1	1	1	1	1	1		Cat-tail Spring	Bridger D7	Bridgerian
AMNH	1341		12353	Hyracodontidae	Hyrachyus	eximius	podial - row 2 seventh from left	podial	1	1	1	1	1	1	1	1		Cat-tail Spring	Bridger D12	Bridgerian
AMNH	1341		12353	Hyracodontidae	Hyrachyus	eximius	podial - row 2 third from left	podial	1	1	1	1	1	1	1	1		Cat-tail Spring	Bridger D8	Bridgerian
AMNH	1341		12353	Hyracodontidae	Hyrachyus	eximius	podial - row 3 far left	podial	1	1	1	1	1	1	1	1		Cat-tail Spring	Bridger D13	Bridgerian
AMNH	1341		12353	Hyracodontidae	Hyrachyus	eximius	podial - row 3 second from left	podial	1	1	1	1	1	1	1	1		Cat-tail Spring	Bridger D14	Bridgerian
AMNH	1341		12353	Hyracodontidae	Hyrachyus	eximius	podial - row 3 third from left	podial	1	1	1	1	1	1	1	1		Cat-tail Spring	Bridger D15	Bridgerian
AMNH	1341		12353	Hyracodontidae	Hyrachyus	eximius	sesimoid - row 2 sixth from left	podial	1	1	1	1	1	1	1	1		Cat-tail Spring	Bridger D11	Bridgerian
AMNH	1341		12353	Hyracodontidae	Hyrachyus	eximius	sesimoid - row 3 fifth from left	podial	1	1	1	1	1	1	1	1		Cat-tail Spring	Bridger D17	Bridgerian
AMNH	1341		12353	Hyracodontidae	Hyrachyus	eximius	sesimoid - row 3 sixth from left	podial	1	1	1	1	1	1	1	1		Cat-tail Spring	Bridger D18	Bridgerian
AMNH	1305		12368	Hyracodontidae	Hyrachyus	eximius	podial row 1 fifth from left	podial	2	1	2	1	2	2	1	2		Henry's Fork LT	Bridger, upper white level	Bridgerian	no	18 elements, in association (two pictures)	6.025.07
AMNH	1305		12368	Hyracodontidae	Hyrachyus	eximius	podial- row 1 first from left	podial	2	1	2	1	1	1	1	2		Henry's Fork LT	Bridger, upper white level	Bridgerian	no	14 elements, in association (two pictures)	6.025.03
AMNH	1305		12368	Hyracodontidae	Hyrachyus	eximius	podial row 1 fourth from left	podial	2	1	2	1	1	1	1	2		Henry's Fork LT	Bridger, upper white level	Bridgerian	no	17 elements, in association (two pictures)	6.025.06
AMNH	1305		12368	Hyracodontidae	Hyrachyus	eximius	podial row 1 second from left	podial	1	1	1	1	1	1	1	1		Henry's Fork LT	Bridger, upper white level	Bridgerian	no	15 elements, in association (two pictures)	6.025.04
AMNH	1305		12368	Hyracodontidae	Hyrachyus	eximius	podial row 1 third from left	podial	2	1	2	1	1	1	1	1		Henry's Fork LT	Bridger, upper white level	Bridgerian	no	16 elements, in association (two pictures)	6.025.05
AMNH	1305		12368	Hyracodontidae	Hyrachyus	eximius	podial row 2 fifth from left	podial	1	2	1	1	1	1	1	2		Henry's Fork LT	Bridger, upper white level	Bridgerian	no	23 elements, in association (two pictures)	6.025.12
AMNH	1305		12368	Hyracodontidae	Hyrachyus	eximius	podial row 2 first from left	podial	1	1	1	1	1	1	1	2		Henry's Fork LT	Bridger, upper white level	Bridgerian	no	19 elements, in association (two pictures)	6.025.08
AMNH	1305		12368	Hyracodontidae	Hyrachyus	eximius	podial row 2 fourth from left	podial	2	1	2	1	1	1	1	2		Henry's Fork LT	Bridger, upper white level	Bridgerian	no	22 elements, in association (two pictures)	6.025.11
AMNH	1305		12368	Hyracodontidae	Hyrachyus	eximius	podial row 2 second from left	podial	1	1	1	1	1	1	1	2		Henry's Fork LT	Bridger, upper white level	Bridgerian	no	20 elements, in association (two pictures)	6.025.09
AMNH	1305		12368	Hyracodontidae	Hyrachyus	eximius	podial row 2 sixth from left	podial	2	1	2	1	1	1	1	2		Henry's Fork LT	Bridger, upper white level	Bridgerian	no	24 elements, in association (two pictures)	6.025.13
AMNH	1305		12368	Hyracodontidae	Hyrachyus	eximius	podial row 2 third from left	podial	1	1	2	1	1	1	1	2		Henry's Fork LT	Bridger, upper white level	Bridgerian	no	21 elements, in association (two pictures)	6.025.10
AMNH	1319		12665	Hyracodontidae	Hyrachyus	eximius	astragalus	podial	1	2	1	1	1	1	1	2		Grizzly Buttes	Bridger	Bridgerian	no	hind leg and foot	6.025.05
AMNH	1327		12665	Hyracodontidae	Hyrachyus	eximius	astragalus	podial	1	1	1	2	2	2	1	1		Grizzly Buttes	Bridger	Bridgerian
AMNH	1322		12665	Hyracodontidae	Hyrachyus	eximius	calcaneum	podial	1	1	1	1	2	2	1	2		Grizzly Buttes	Bridger	Bridgerian	yes	minor on distal end; part of associated limb	6.025.05
AMNH	1319		12665	Hyracodontidae	Hyrachyus	eximius	podial- lower left nearer astragalus	podial	1	1	1	1	1	1	1	1		Grizzly Buttes	Bridger	Bridgerian
AMNH	1319		12665	Hyracodontidae	Hyrachyus	eximius	podial- lower left nearer metapodial	podial	1	1	1	1	1	1	1	1		Grizzly Buttes	Bridger	Bridgerian
AMNH	1319		12665	Hyracodontidae	Hyrachyus	eximius	podial- lower right	podial	1	2	1	1	1	1	1	1		Grizzly Buttes	Bridger	Bridgerian
AMNH	1319		12665	Hyracodontidae	Hyrachyus	eximius	podial- middle left	podial	2	1	1	1	1	1	1	1		Grizzly Buttes	Bridger	Bridgerian
AMNH	1319		12665	Hyracodontidae	Hyrachyus	eximius	podial- top left	podial	1	1	1	1	1	1	1	1		Grizzly Buttes	Bridger	Bridgerian
AMNH	1319		12665	Hyracodontidae	Hyrachyus	eximius	podial- upper right	podial	1	2	1	1	1	1	1	1		Grizzly Buttes	Bridger	Bridgerian
AMNH	1313		12673	Hyracodontidae	Hyrachyus	eximius	calcaneum	podial	1	1	2	1	2	2	1	2		Henry's Fork LT	Bridger, lower	Bridgerian	no
AMNH	1318		12673	Hyracodontidae	Hyrachyus	eximius	podial - row 2 second from left	podial	1	1	1	1	1	1	1	1		Henry's Fork LT	Bridger, lower	Bridgerian
AMNH	1318		12673	Hyracodontidae	Hyrachyus	eximius	podial- row 1 first from left	podial	1	2	1	1	1	1	1	1		Henry's Fork LT	Bridger, lower	Bridgerian
AMNH	1318		12673	Hyracodontidae	Hyrachyus	eximius	podial- row 1 fourth from left	podial	1	1	1	1	1	1	1	1		Henry's Fork LT	Bridger, lower	Bridgerian
AMNH	1318		12673	Hyracodontidae	Hyrachyus	eximius	podial- row 2 far left	podial	1	1	1	1	1	1	1	1		Henry's Fork LT	Bridger, lower	Bridgerian
AMNH	1318		12673	Hyracodontidae	Hyrachyus	eximius	podial- row 2 fourth from left	podial	1	2	1	1	1	1	1	1		Henry's Fork LT	Bridger, lower	Bridgerian
AMNH	1318		12673	Hyracodontidae	Hyrachyus	eximius	podial- row 2 third from left	podial	1	1	1	1	1	1	1	1		Henry's Fork LT	Bridger, lower	Bridgerian
AMNH	1318		12673	Hyracodontidae	Hyrachyus	eximius	podial- row 3 fifth from left	podial	1	1	1	1	1	1	1	1		Henry's Fork LT	Bridger, lower	Bridgerian
AMNH	1318		12673	Hyracodontidae	Hyrachyus	eximius	podial- row 3 second from left	podial	1	2	1	1	1	1	1	1		Henry's Fork LT	Bridger, lower	Bridgerian
AMNH	1318		12673	Hyracodontidae	Hyrachyus	eximius	podial- row 3 third from left	podial	1	1	1	1	3	2	1	2		Henry's Fork LT	Bridger, lower	Bridgerian
AMNH	1318		12673	Hyracodontidae	Hyrachyus	eximius	podial-row 3 fourth from left	podial	1	1	1	1	1	1	1	3		Henry's Fork LT	Bridger, lower	Bridgerian
AMNH	1324		12674	Hyracodontidae	Hyrachyus	eximius	astragalus	podial	1	1	1	1	1	1	2	1				Bridgerian
AMNH	1324		12674	Hyracodontidae	Hyrachyus	eximius	calcaneum	podial	1	1	1	1	1	1	1	3				Bridgerian
AMNH	1324		12674	Hyracodontidae	Hyrachyus	eximius	podial- row 1	podial	1	1	1	1	1	1	1	1				Bridgerian
AMNH	1324		12674	Hyracodontidae	Hyrachyus	eximius	podial- row 2 left	podial	1	2	1	1	1	1	1	1				Bridgerian
AMNH	1324		12674	Hyracodontidae	Hyrachyus	eximius	podial- row 2 left	podial	1	2	1	2	1	1	1	1				Bridgerian
AMNH	1324		12674	Hyracodontidae	Hyrachyus	eximius	podial- row 3 left	podial	1	1	1	1	1	1	1	1				Bridgerian
AMNH	1324		12674	Hyracodontidae	Hyrachyus	eximius	podial- row 3 middle	podial	1	2	1	1	1	1	1	1				Bridgerian
AMNH	1324		12674	Hyracodontidae	Hyrachyus	eximius	podial- row 3 right	podial	1	2	1	1	1	1	1	1				Bridgerian
AMNH	161		12675	Hyracodontidae	Hyrachyus	eximius	calcaneum	podial	1	1	2	1	1	2	1	2		Kinney Ranch	Bridger, lower	Bridgerian	no		6.027.07
AMNH	1297, 1298		93050	Hyracodontidae	Hyrachyus	eximius	podial	podial	1	1	1	1	1	1	1	1		Henry's Fork LT	Bridger, 50ft below white layer	Bridgerian	no	photographed for later element id	6.025.01
AMNH	1337		93061	Hyracodontidae	Hyrachyus	eximius	calcaneum	podial	1	1	1	1	1	1	1	3		Grizzly Buttes East	Bridger	Bridgerian
AMNH	1337		93061	Hyracodontidae	Hyrachyus	eximius	calcaneum partial	podial	1	1	1	1	1	1	1	2		Grizzly Buttes East	Bridger	Bridgerian
AMNH	1310		93061	Hyracodontidae	Hyrachyus	eximius	cuboid	podial	2	1	3	1	1	1	1	1		Grizzly Buttes East	Bridger	Bridgerian	yes	s'mores effect	6.025.07
AMNH	1310		93064	Hyracodontidae	Hyrachyus	eximius	associated astragalus, calcaneum, and podial	podial	1	1	1	1	1	1	1	2		Henry's Fork LT	Bridger, upper sandstones	Bridgerian			6.025.03
AMNH	1310		93064	Hyracodontidae	Hyrachyus	eximius	podial	podial	1	1	1	1	2	2	1	2		Henry's Fork LT	Bridger, upper sandstones	Bridgerian			6.025.03
AMNH	1360		98726	Hyracodontidae	Hyrachyus	eximius	pisiform	podial	1	1	2	2	2	2	1	2		S. Hyopsodus Hill, Tabernacle Butte	Bridger, upper	Bridgerian	no		6.027.02
AMNH	1359		105435	Hyracodontidae	Hyrachyus	modestus	astragalus- partial	podial	1	1	2	1	2	2	2	3		Tabernacle Butte	Bridger, upper	Bridgerian	no		6.027.02
AMNH	1325, 1326		12665-a	Hyracodontidae	Hyrachyus	eximius	astrag & calcaneum	podial	2	1	2	1	2	2	1	2		Grizzly Buttes	Bridger	Bridgerian	yes	minor on distal end of calcaneum, medial side of astrag; no articular surface	6.025.05
AMNH	152		1536-A	Hyracodontidae	Hyrachyus	eximius	astragalus	podial	2	1	2	2	2	2	2	3		Bridger Basin	Bridger	Bridgerian	Yes	very minor	6.027.06
AMNH	151		1592-A	Hyracodontidae	Hyrachyus	eximius	astragalus	podial	3	2	3	2	2	3	1	2		Bridger Basin	Bridger	Bridgerian	Yes	minor on distal edge, not on articular surface	6.027.06
AMNH	149		1596-A	Hyracodontidae	Hyrachyus	eximius	astragalus	podial	1	2	1	3	2	2	3	2		Bridger Basin	Bridger	Bridgerian	no		6.027.06
AMNH	1372		1644-A	Hyracodontidae	Hyrachyus	eximius	calcaneum	podial	2	1	2	1	1	2	1	4		Bridger Basin	Bridger	Bridgerian
AMNH	1373		1644-A	Hyracodontidae	Hyrachyus	eximius	podial - left	podial	2	1	2	1	2	2	1	1		Bridger Basin	Bridger	Bridgerian
AMNH	1373		1644-A	Hyracodontidae	Hyrachyus	eximius	podial - middle	podial	2	1	1	1	1	1	1	1		Bridger Basin	Bridger	Bridgerian
AMNH	1372		1644-A	Hyracodontidae	Hyrachyus	eximius	podial - row 2 right	podial	2	1	2	1	1	1	1	1		Bridger Basin	Bridger	Bridgerian
AMNH	1372		1644-A	Hyracodontidae	Hyrachyus	eximius	podial- row 1 right	podial	1	1	1	1	1	1	1	1		Bridger Basin	Bridger	Bridgerian
AMNH	1365		5065-b	Hyracodontidae	Hyrachyus	eximius	calcaneum - left	podial	2	1	2	1	2	2	1	3		Bridger Basin	Bridger	Bridgerian	yes	extras from mounted skeleton; minor on 'heel'	6.027.04
AMNH	1365		5065-b	Hyracodontidae	Hyrachyus	eximius	calcaneum - middle	podial	1	1	1	1	2	2	1	3		Bridger Basin	Bridger	Bridgerian
AMNH	1365		5065-b	Hyracodontidae	Hyrachyus	eximius	calcaneum - right	podial	1	1	1	1	2	2	1	3		Bridger Basin	Bridger	Bridgerian
AMNH	156		1602	Hyracodontidae	Hyrachyus	eximius	axis	vertebrae	1	1	1	1	2	1	1	1		Bridger Basin	Bridger	Bridgerian	no	Part of skeleton on display	6.027.07
									1.35273	1.11273	1.35636	1.18545	1.32364	1.39636	1.06909	2.12
UCMP	K15A, K15B, K15C, K15D	1	32011	Rhinocerotidae	Trigonias	osborni	Femur L	limb bone	1	1	2	3	3	3	2	4	V5409	Figgins Quarry	White River	Chadronian	yes	cysting and possible overgrowth on distal end	V255-6
UCMP	K34A, K34B	1	32011	Rhinocerotidae	Trigonias	osborni	humerus	limb bone	2	1	2	2	2	2	2	4	V5409	Figgins Quarry	White River	Chadronian	no	check	V255-6
UCMP	K16A, K16B	1	32011	Rhinocerotidae	Trigonias	osborni	Humerus L	limb bone	1	1	1	2	2	2	2	2	V5409	Figgins Quarry	White River	Chadronian	yes	small cysting on distal end	V255-6
UCMP	K17	1	32011	Rhinocerotidae	Trigonias	osborni	Humerus L	limb bone	1	1	2	1	1	1	1	3	V5409	Figgins Quarry	White River	Chadronian	yes	small cysting on distal end	V255-6
UCMP	K30A, K30B	2	32011	Rhinocerotidae	Trigonias	osborni	L radius and ulna	limb bone	2	1	3	3	2	2	1	3	V5409	Figgins Quarry	White River	Chadronian	no	some cysts	V255-6
UCMP	K11A, K11B	1	32011	Rhinocerotidae	Trigonias	osborni	L scapula	limb bone	2	1	3	1	2	2	1	4	V5409	Figgins Quarry	White River	Chadronian	no	few cysts	V255-5
UCMP	K12A, K11B	1	32011	Rhinocerotidae	Trigonias	osborni	L scapula	limb bone	1	1	2	2	3	3	1	4	V5409	Figgins Quarry	White River	Chadronian	no	few cysts	V255-5
UCMP	K10	1	32011	Rhinocerotidae	Trigonias	osborni	L tibia	limb bone	3	1	2	3	2	3	1	4	V5409	Figgins Quarry	White River	Chadronian	no		V255-5
UCMP	K31A, K31B	1	32011	Rhinocerotidae	Trigonias	osborni	L tibia	limb bone	2	1	3	2	3	3	1	3	V5409	Figgins Quarry	White River	Chadronian	no	few cysts	V255-6
UCMP	K32A, K32B	2	32011	Rhinocerotidae	Trigonias	osborni	L tibia and fibula	limb bone	2	1	2	2	2	2	3	3	V5409	Figgins Quarry	White River	Chadronian	no	few cysts	V255-6
UCMP	K35A, K35B	1	32011	Rhinocerotidae	Trigonias	osborni	Patellas	limb bone	2	1	1	1	1	1	1	1	V5409	Figgins Quarry	White River	Chadronian	no		V255-6
UCMP	K8	1	32011	Rhinocerotidae	Trigonias	osborni	R tibio-fibula	limb bone	2	1	3	3	2	3	2	4	V5409	Figgins Quarry	White River	Chadronian	no		V255-5
UCMP	K9	1	32011	Rhinocerotidae	Trigonias	osborni	R ulna	limb bone	3	2	4	3	3	3	1	3	V5409	Figgins Quarry	White River	Chadronian	no		V255-5
UCMP	K14A, K14B	2	32011	Rhinocerotidae	Trigonias	osborni	radius and ulna R	limb bone	2	1	2	3	3	3	1	3	V5409	Figgins Quarry	White River	Chadronian	yes	cysting and possible overgrowth on distal end	V255-6
UCMP	K33A, K33B	1	32011	Rhinocerotidae	Trigonias	osborni	very warped L femur	limb bone	2	1	1	2	2	2	2	4	V5409	Figgins Quarry	White River	Chadronian	no	nice regrowth	V255-6
UCMP	K35A, K35B	1	32011	Rhinocerotidae	Trigonias	osborni	Patellas	limb bone	1	1	2	1	1	1	1	1	V5409	Figgins Quarry	White River	Chadronian
UCMP	K35A, K35B	1	32011	Rhinocerotidae	Trigonias	osborni	Patellas	limb bone	1	1	1	1	1	1	1	1	V5409	Figgins Quarry	White River	Chadronian
UCMP	K35A, K35B	1	32011	Rhinocerotidae	Trigonias	osborni	Patellas	limb bone	1	1	1	1	1	1	1	1	V5409	Figgins Quarry	White River	Chadronian
UCMP	K35A, K35B	1	32011	Rhinocerotidae	Trigonias	osborni	Patellas	limb bone	2	1	2	1	1	1	1	1	V5409	Figgins Quarry	White River	Chadronian
UCMP	K35A, K35B	1	32011	Rhinocerotidae	Trigonias	osborni	Patellas	limb bone	2	1	2	1	1	1	1	1	V5409	Figgins Quarry	White River	Chadronian
UCMP	K1A, K1B	1	32011	Rhinocerotidae	Trigonias	osborni	L Humerus	limb bone	2	1	2	3	2	2	1	4	V5409	Figgins Quarry	White River	Chadronian	No	not well developed	V226-3
UCMP	K2A, K2B	1	32011	Rhinocerotidae	Trigonias	osborni	R Humerus	limb bone	3	1	2	3	2	2	3	4	V5409	Figgins Quarry	White River	Chadronian	no	none visible	V226-3
UCMP	K3A, K3B, K3C	1	32011	Rhinocerotidae	Trigonias	osborni	R Humerus	limb bone	2	1	2	2	2	3	1	4	V5409	Figgins Quarry	White River	Chadronian	no	proximal and distal not well developed	V226-3
UCMP	K26	1	32011	Rhinocerotidae	Trigonias	osborni	metapodial- lower	metapodial	2	1	3	3	2	3	1	1	V5409	Figgins Quarry	White River	Chadronian
UCMP	K29A, K29B	1	32011	Rhinocerotidae	Trigonias	osborni	metapodial- row 1 far right	metapodial	2	1	3	2	2	2	2	1	V5409	Figgins Quarry	White River	Chadronian	no		V255-6
UCMP	K29A, K29B	1	32011	Rhinocerotidae	Trigonias	osborni	metapodial- row 2 far left	metapodial	1	1	1	1	2	2	1	1	V5409	Figgins Quarry	White River	Chadronian
UCMP	K29A, K29B	1	32011	Rhinocerotidae	Trigonias	osborni	metapodial- row 2 far right	metapodial	1	1	1	1	1	1	1	1	V5409	Figgins Quarry	White River	Chadronian
UCMP	K29A, K29B	1	32011	Rhinocerotidae	Trigonias	osborni	metapodial- row 2 middle left	metapodial	1	1	1	1	1	1	1	1	V5409	Figgins Quarry	White River	Chadronian
UCMP	K29A, K29B	1	32011	Rhinocerotidae	Trigonias	osborni	metapodial- row 2 middle right	metapodial	1	1	1	1	1	1	1	1	V5409	Figgins Quarry	White River	Chadronian
UCMP	K29A, K29B	1	32011	Rhinocerotidae	Trigonias	osborni	metapodial- row 3 far left	metapodial	2	1	1	1	1	2	1	1	V5409	Figgins Quarry	White River	Chadronian
UCMP	K29A, K29B	1	32011	Rhinocerotidae	Trigonias	osborni	metapodial- row 3 far right	metapodial	2	1	1	1	1	2	1	1	V5409	Figgins Quarry	White River	Chadronian
UCMP	K29A, K29B	1	32011	Rhinocerotidae	Trigonias	osborni	metapodial- row 3 middle left	metapodial	1	1	1	1	1	1	1	1	V5409	Figgins Quarry	White River	Chadronian
UCMP	K29A, K29B	1	32011	Rhinocerotidae	Trigonias	osborni	metapodial- row 3 middle right	metapodial	1	1	1	1	1	1	1	1	V5409	Figgins Quarry	White River	Chadronian
UCMP	K29A, K29B	1	32011	Rhinocerotidae	Trigonias	osborni	metapodial- row 4 far left	metapodial	2	1	2	1	1	1	2	1	V5409	Figgins Quarry	White River	Chadronian
UCMP	K29A, K29B	1	32011	Rhinocerotidae	Trigonias	osborni	metapodial- row 4 far right	metapodial	2	2	2	1	2	2	2	1	V5409	Figgins Quarry	White River	Chadronian
UCMP	K29A, K29B	1	32011	Rhinocerotidae	Trigonias	osborni	metapodial- row 4 middle left	metapodial	2	2	2	1	2	2	2	1	V5409	Figgins Quarry	White River	Chadronian
UCMP	K29A, K29B	1	32011	Rhinocerotidae	Trigonias	osborni	metapodial- row 4 middle right	metapodial	2	2	2	1	2	2	2	1	V5409	Figgins Quarry	White River	Chadronian
UCMP	K29A, K29B	1	32011	Rhinocerotidae	Trigonias	osborni	metapodial- row 5 far left	metapodial	2	3	3	1	2	2	2	1	V5409	Figgins Quarry	White River	Chadronian
UCMP	K29A, K29B	1	32011	Rhinocerotidae	Trigonias	osborni	metapodial- row 5 far right	metapodial	2	2	2	1	2	2	1	1	V5409	Figgins Quarry	White River	Chadronian
UCMP	K29A, K29B	1	32011	Rhinocerotidae	Trigonias	osborni	metapodial- row 5 middle left	metapodial	3	3	3	1	2	2	3	1	V5409	Figgins Quarry	White River	Chadronian
UCMP	K29A, K29B	1	32011	Rhinocerotidae	Trigonias	osborni	metapodial- row 5 middle right	metapodial	2	2	2	1	2	2	1	1	V5409	Figgins Quarry	White River	Chadronian
UCMP	K29A, K29B	1	32011	Rhinocerotidae	Trigonias	osborni	metapodial- row 6 far left	metapodial	2	2	2	1	2	2	1	1	V5409	Figgins Quarry	White River	Chadronian
UCMP	K29A, K29B	1	32011	Rhinocerotidae	Trigonias	osborni	metapodial- row 6 far right	metapodial	1	1	2	1	2	3	1	1	V5409	Figgins Quarry	White River	Chadronian
UCMP	K29A, K29B	1	32011	Rhinocerotidae	Trigonias	osborni	metapodial- row 6 middle left	metapodial	1	1	2	2	2	3	1	1	V5409	Figgins Quarry	White River	Chadronian
UCMP	K29A, K29B	1	32011	Rhinocerotidae	Trigonias	osborni	metapodial- row 6 middle right	metapodial	1	1	2	2	2	3	1	1	V5409	Figgins Quarry	White River	Chadronian
UCMP	K26	1	32011	Rhinocerotidae	Trigonias	osborni	metapodial- upper	metapodial	2	1	3	3	2	3	2	1	V5409	Figgins Quarry	White River	Chadronian	no		V255-6
UCMP	K21	1	32011	Rhinocerotidae	Trigonias	osborni	Metatarsal- bottom	metapodial	2	1	2	1	2	2	1	2	V5409	Figgins Quarry	White River	Chadronian
UCMP	K20A, K20B	1	32011	Rhinocerotidae	Trigonias	osborni	Metatarsal L	metapodial	2	1	2	1	3	3	1	2	V5409	Figgins Quarry	White River	Chadronian	yes	good example of bone regrowth	V255-6
UCMP	K18	2	32011	Rhinocerotidae	Trigonias	osborni	Metatarsal- Lower	metapodial	2	1	2	2	2	2	1	2	V5409	Figgins Quarry	White River	Chadronian
UCMP	K21	1	32011	Rhinocerotidae	Trigonias	osborni	Metatarsal- middle	metapodial	2	1	2	1	3	3	2	2	V5409	Figgins Quarry	White River	Chadronian
UCMP	K21	1	32011	Rhinocerotidae	Trigonias	osborni	Metatarsal- upper	metapodial	2	1	2	2	2	2	1	2	V5409	Figgins Quarry	White River	Chadronian	no		V255-6
UCMP	K18	2	32011	Rhinocerotidae	Trigonias	osborni	Metatarsal- upper	metapodial	2	1	2	1	2	2	1	3	V5409	Figgins Quarry	White River	Chadronian	yes	small amount of cysting and smores	V255-6
UCMP	K6	3	32011	Rhinocerotidae	Trigonias	osborni	metapodials	metapodial	2	1	2	1	2	2	1	3	V5409	Figgins Quarry	White River	Chadronian	no		V226-3
UCMP	K6	3	32011	Rhinocerotidae	Trigonias	osborni	metapodials	metapodial	2	1	1	1	1	2	1	3	V5409	Figgins Quarry	White River	Chadronian
UCMP	K6	3	32011	Rhinocerotidae	Trigonias	osborni	metapodials	metapodial	2	2	2	2	1	2	1	3	V5409	Figgins Quarry	White River	Chadronian
UCMP	K16	1	32011	Rhinocerotidae	Trigonias	osborni	phalanx	phalanx	2	1	2	2	2	2	1	3	V5409	Figgins Quarry	White River	Chadronian
UCMP	K17	1	32011	Rhinocerotidae	Trigonias	osborni	phalanx	phalanx	1	1	2	1	2	2	1	1	V5409	Figgins Quarry	White River	Chadronian
UCMP	K18	1	32011	Rhinocerotidae	Trigonias	osborni	phalanx	phalanx	2	1	2	1	2	2	1	1	V5409	Figgins Quarry	White River	Chadronian
UCMP	K19	1	32011	Rhinocerotidae	Trigonias	osborni	phalanx	phalanx	2	1	2	1	2	2	1	1	V5409	Figgins Quarry	White River	Chadronian
UCMP	K20	1	32011	Rhinocerotidae	Trigonias	osborni	phalanx	phalanx	2	1	2	1	1	1	1	1	V5409	Figgins Quarry	White River	Chadronian
UCMP	K21	1	32011	Rhinocerotidae	Trigonias	osborni	phalanx	phalanx	2	1	2	1	1	1	1	1	V5409	Figgins Quarry	White River	Chadronian
UCMP	K22	1	32011	Rhinocerotidae	Trigonias	osborni	phalanx	phalanx	2	1	2	1	1	1	1	1	V5409	Figgins Quarry	White River	Chadronian
UCMP	K23	1	32011	Rhinocerotidae	Trigonias	osborni	phalanx	phalanx	2	1	2	1	2	1	1	1	V5409	Figgins Quarry	White River	Chadronian
UCMP	K24	1	32011	Rhinocerotidae	Trigonias	osborni	phalanx	phalanx	2	1	2	1	1	1	1	1	V5409	Figgins Quarry	White River	Chadronian
UCMP	K37	1	32011	Rhinocerotidae	Trigonias	osborni	phalanx	phalanx	2	2	2	1	1	1	1	1	V5409	Figgins Quarry	White River	Chadronian	yes	smores	V255-6
UCMP	K37	1	32011	Rhinocerotidae	Trigonias	osborni	phalanx	phalanx	2	2	2	1	1	1	1	1	V5409	Figgins Quarry	White River	Chadronian
UCMP	K37	1	32011	Rhinocerotidae	Trigonias	osborni	phalanx	phalanx	2	2	3	1	1	1	1	1	V5409	Figgins Quarry	White River	Chadronian
UCMP	K37	1	32011	Rhinocerotidae	Trigonias	osborni	phalanx	phalanx	2	2	2	1	1	1	1	1	V5409	Figgins Quarry	White River	Chadronian
UCMP	K37	1	32011	Rhinocerotidae	Trigonias	osborni	phalanx	phalanx	2	2	3	1	1	1	1	1	V5409	Figgins Quarry	White River	Chadronian
UCMP	K37	1	32011	Rhinocerotidae	Trigonias	osborni	phalanx	phalanx	2	2	2	2	1	1	1	1	V5409	Figgins Quarry	White River	Chadronian
UCMP	K37	1	32011	Rhinocerotidae	Trigonias	osborni	phalanx	phalanx	2	2	2	1	1	1	1	1	V5409	Figgins Quarry	White River	Chadronian
UCMP	K37	1	32011	Rhinocerotidae	Trigonias	osborni	phalanx	phalanx	2	2	2	1	1	1	1	1	V5409	Figgins Quarry	White River	Chadronian
UCMP	K37	1	32011	Rhinocerotidae	Trigonias	osborni	phalanx	phalanx	2	2	2	1	1	1	1	1	V5409	Figgins Quarry	White River	Chadronian
UCMP	K37	1	32011	Rhinocerotidae	Trigonias	osborni	phalanx	phalanx	2	2	2	1	1	1	1	1	V5409	Figgins Quarry	White River	Chadronian
UCMP	K37	1	32011	Rhinocerotidae	Trigonias	osborni	phalanx	phalanx	2	2	2	1	1	1	1	1	V5409	Figgins Quarry	White River	Chadronian
UCMP	K37	1	32011	Rhinocerotidae	Trigonias	osborni	phalanx	phalanx	2	2	2	1	1	1	1	1	V5409	Figgins Quarry	White River	Chadronian
UCMP	K37	1	32011	Rhinocerotidae	Trigonias	osborni	phalanx	phalanx	2	2	2	1	1	1	1	1	V5409	Figgins Quarry	White River	Chadronian
UCMP	K37	1	32011	Rhinocerotidae	Trigonias	osborni	phalanx	phalanx	2	2	2	1	1	1	1	1	V5409	Figgins Quarry	White River	Chadronian
UCMP	K37	1	32011	Rhinocerotidae	Trigonias	osborni	phalanx	phalanx	2	2	2	1	1	1	1	1	V5409	Figgins Quarry	White River	Chadronian
UCMP	K37	1	32011	Rhinocerotidae	Trigonias	osborni	phalanx	phalanx	2	2	2	1	1	1	1	1	V5409	Figgins Quarry	White River	Chadronian
UCMP	K37	1	32011	Rhinocerotidae	Trigonias	osborni	phalanx	phalanx	2	2	2	1	1	1	1	1	V5409	Figgins Quarry	White River	Chadronian
UCMP	K37	1	32011	Rhinocerotidae	Trigonias	osborni	phalanx	phalanx	2	2	2	1	1	1	1	1	V5409	Figgins Quarry	White River	Chadronian
UCMP	K37	1	32011	Rhinocerotidae	Trigonias	osborni	phalanx	phalanx	2	2	2	1	2	2	1	1	V5409	Figgins Quarry	White River	Chadronian
UCMP	K37	1	32011	Rhinocerotidae	Trigonias	osborni	phalanx	phalanx	2	2	2	1	1	1	1	1	V5409	Figgins Quarry	White River	Chadronian
UCMP	K37	1	32011	Rhinocerotidae	Trigonias	osborni	phalanx	phalanx	2	2	2	1	1	1	1	1	V5409	Figgins Quarry	White River	Chadronian
UCMP	K37	1	32011	Rhinocerotidae	Trigonias	osborni	phalanx	phalanx	2	2	2	1	1	1	1	1	V5409	Figgins Quarry	White River	Chadronian
UCMP	K37	1	32011	Rhinocerotidae	Trigonias	osborni	phalanx	phalanx	2	2	2	1	2	2	1	1	V5409	Figgins Quarry	White River	Chadronian
UCMP	K37	1	32011	Rhinocerotidae	Trigonias	osborni	phalanx	phalanx	2	2	2	1	1	1	1	1	V5409	Figgins Quarry	White River	Chadronian
UCMP	K28A, K28B	1	32011	Rhinocerotidae	Trigonias	osborni	third phalanx	phalanx	2	1	1	1	2	2	1	1	V5409	Figgins Quarry	White River	Chadronian	yes		V255-6
UCMP	K23A, K23B	1	32011	Rhinocerotidae	Trigonias	osborni	astragalus	podial	3	1	3	2	3	3	1	1	V5409	Figgins Quarry	White River	Chadronian	yes	regrowth/odd	V255-6
UCMP	K27	8	32011	Rhinocerotidae	Trigonias	osborni	Calcaneum	podial	2	2	2	1	2	2	2	2	V5409	Figgins Quarry	White River	Chadronian	no		V255-6
UCMP	K22	1	32011	Rhinocerotidae	Trigonias	osborni	Calcaneum	podial	3	1	2	1	2	3	1	2	V5409	Figgins Quarry	White River	Chadronian	yes	regrowth/smores	V255-6
UCMP	K26B	1	32011	Rhinocerotidae	Trigonias	osborni	cuneiform- lower far left	podial	2	1	2	1	1	1	1	2	V5409	Figgins Quarry	White River	Chadronian
UCMP	K26B	1	32011	Rhinocerotidae	Trigonias	osborni	cuneiform- lower far right	podial	2	1	2	1	1	1	1	2	V5409	Figgins Quarry	White River	Chadronian
UCMP	K26B	1	32011	Rhinocerotidae	Trigonias	osborni	cuneiform- lower middle left	podial	2	1	2	1	1	1	1	2	V5409	Figgins Quarry	White River	Chadronian
UCMP	K26B	1	32011	Rhinocerotidae	Trigonias	osborni	cuneiform- lower middle right	podial	2	1	2	1	1	1	1	2	V5409	Figgins Quarry	White River	Chadronian
UCMP	K26B	1	32011	Rhinocerotidae	Trigonias	osborni	cuneiform- upper far left	podial	2	1	2	1	1	1	1	2	V5409	Figgins Quarry	White River	Chadronian
UCMP	K26B	1	32011	Rhinocerotidae	Trigonias	osborni	cuneiform- upper far right	podial	2	1	2	1	1	1	1	2	V5409	Figgins Quarry	White River	Chadronian
UCMP	K26B	1	32011	Rhinocerotidae	Trigonias	osborni	cuneiform- upper middle left	podial	2	1	2	1	1	1	1	2	V5409	Figgins Quarry	White River	Chadronian
UCMP	K26B	1	32011	Rhinocerotidae	Trigonias	osborni	cuneiform- upper middle right	podial	2	1	2	1	1	1	2	2	V5409	Figgins Quarry	White River	Chadronian
UCMP	K28A, K28B	1	32011	Rhinocerotidae	Trigonias	osborni	lower left podial	podial	2	1	2	1	2	2	1	1	V5409	Figgins Quarry	White River	Chadronian
UCMP	K28A, K28B	1	32011	Rhinocerotidae	Trigonias	osborni	middle left triangular carpal	podial	1	1	1	1	1	2	1	1	V5409	Figgins Quarry	White River	Chadronian
UCMP	K28A, K28B	1	32011	Rhinocerotidae	Trigonias	osborni	middle right triangular podial	podial	2	1	3	1	2	2	1	1	V5409	Figgins Quarry	White River	Chadronian
UCMP	K28A, K28B	1	32011	Rhinocerotidae	Trigonias	osborni	pisiform	podial	2	1	2	2	2	2	1	1	V5409	Figgins Quarry	White River	Chadronian
UCMP	K38	1	32011	Rhinocerotidae	Trigonias	osborni	pisiform- bottom	podial	2	1	2	1	2	3	1	3	V5409	Figgins Quarry	White River	Chadronian
UCMP	K38	1	32011	Rhinocerotidae	Trigonias	osborni	pisiform- left upper	podial	2	1	2	1	2	3	1	2	V5409	Figgins Quarry	White River	Chadronian	no	check	V255-6
UCMP	K38	1	32011	Rhinocerotidae	Trigonias	osborni	pisiform- right upper	podial	2	1	2	3	2	3	1	2	V5409	Figgins Quarry	White River	Chadronian
UCMP	K24A, K24B, K24C	1	32011	Rhinocerotidae	Trigonias	osborni	podial	podial	3	2	3	1	2	2	2	1	V5409	Figgins Quarry	White River	Chadronian	yes	smores	V255-6
UCMP	K28A, K28B	1	32011	Rhinocerotidae	Trigonias	osborni	small rounded podial	podial	1	1	1	1	1	1	1	1	V5409	Figgins Quarry	White River	Chadronian
UCMP	K4A, K4B	1	32011	Rhinocerotidae	Trigonias	osborni	Navicular	podial	2	1	3	1	2	2	1	1	V5409	Figgins Quarry	White River	Chadronian	1	minimal cysting, smores effect	V226-3
UCMP	K4C	2	32011	Rhinocerotidae	Trigonias	osborni	Navicular- left	podial	2	1	2	1	1	1	1	1	V5409	Figgins Quarry	White River	Chadronian
UCMP	K4C	2	32011	Rhinocerotidae	Trigonias	osborni	Navicular- Righht	podial	2	1	2	1	2	2	1	1	V5409	Figgins Quarry	White River	Chadronian
UCMP	K7A, K7B	2	32011	Rhinocerotidae	Trigonias	osborni	pisiform- left	podial	2	1	2	1	1	1	1	3	V5409	Figgins Quarry	White River	Chadronian	No		V226-3
UCMP	K7A, K7B	2	32011	Rhinocerotidae	Trigonias	osborni	pisiform- right	podial	2	1	2	1	1	1	1	3	V5409	Figgins Quarry	White River	Chadronian
									1.89474	1.33333	2	1.34211	1.57895	1.7193	1.19298	1.66667
AMNH	204		144571	Rhinocerotidae	Menoceras	arikarense	scapula	girdle	2	2	2	3	2	3	1	4	ETE Locality 1506	Agate Spring Quarry	Harrison	Arikareean	no	Kelsey says "no"	6.138.05
AMNH	205		144572	Rhinocerotidae	Menoceras	arikarense	scapula	girdle	2	1	1	1	1	1	1	4	ETE Locality 1506	Agate Spring Quarry	Harrison	Arikareean
AMNH	207		144573	Rhinocerotidae	Menoceras	arikarense	scapula	girdle	2	1	2	1	1	3	1	4	ETE Locality 1506	Agate Spring Quarry	Harrison	Arikareean	no		6.138.06
AMNH	208		144574	Rhinocerotidae	Menoceras	arikarense	scapula	girdle	2	1	1	1	1	3	1	4	ETE Locality 1506	Agate Spring Quarry	Harrison	Arikareean	no		6.138.07
AMNH	209		144575	Rhinocerotidae	Menoceras	arikarense	scapula	girdle	1	1	1	1	1	3	1	3	ETE Locality 1506	Agate Spring Quarry	Harrison	Arikareean	no
AMNH	210		144576	Rhinocerotidae	Menoceras	arikarense	scapula	girdle	2	1	2	1	1	2	1	3	ETE Locality 1506	Agate Spring Quarry	Harrison	Arikareean	no
AMNH	211		144577	Rhinocerotidae	Menoceras	arikarense	scapula	girdle	2	1	2	1	1	1	1	3	ETE Locality 1506	Agate Spring Quarry	Harrison	Arikareean	no
AMNH	212		144578	Rhinocerotidae	Menoceras	arikarense	scapula	girdle	2	1	2	1	1	1	1	3	ETE Locality 1506	Agate Spring Quarry	Harrison	Arikareean	no
AMNH	213		144579	Rhinocerotidae	Menoceras	arikarense	scapula	girdle	2	1	3	1	1	1	1	3	ETE Locality 1506	Agate Spring Quarry	Harrison	Arikareean	no
AMNH	165, 166		14213	Rhinocerotidae	Menoceras	arikarense	humerus	limb bone	3	1	2	3	2	2	2	3	ETE Locality 1506	Agate Spring Quarry	Harrison	Arikareean	no		6.127.01
AMNH	168		14213	Rhinocerotidae	Menoceras	arikarense	radius-ulna	limb bone	2	2	3	3	3	4	1	3	ETE Locality 1506	Agate Spring Quarry	Harrison	Arikareean	no	fused distally	6.127.01
AMNH	175		14214	Rhinocerotidae	Menoceras	arikarense	humerus	limb bone	2	1	2	2	1	2	2	3	ETE Locality 1506	Agate Spring Quarry	Harrison	Arikareean	no		6.127.02
AMNH	179		14214	Rhinocerotidae	Menoceras	arikarense	proximal tibia	limb bone	2	2	2	1	2	2	1	4	ETE Locality 1506	Agate Spring Quarry	Harrison	Arikareean	no	possible minor lipping	6.127.02
AMNH	169, 170		22486	Rhinocerotidae	Menoceras	arikarense	femur	limb bone	2	1	2	3	3	4	1	3	ETE Locality 1506	Agate Spring Quarry	Harrison	Arikareean	yes	minor cysting on proximal and distal ends, near articular surfaces	6.127.02
AMNH	171		22486	Rhinocerotidae	Menoceras	arikarense	humerus	limb bone	3	1	3	3	4	3	3	3	ETE Locality 1506	Agate Spring Quarry	Harrison	Arikareean	yes	remodeling with cysts on proximal end; not on articular surfaces	6.127.02
AMNH	173		22486	Rhinocerotidae	Menoceras	arikarense	radius	limb bone	2	2	3	1	2	2	1	3	ETE Locality 1506	Agate Spring Quarry	Harrison	Arikareean	yes	cysting and lipping on distal end; some on prox end	6.127.02
AMNH	182		22487	Rhinocerotidae	Menoceras	arikarense	fibula	limb bone	3	2	3	1	2	3	1	3	ETE Locality 1506	Agate Spring Quarry	Harrison	Arikareean	yes	cysting on both ends	6.127.05
AMNH	174		22487	Rhinocerotidae	Menoceras	arikarense	humerus	limb bone	2	1	2	3	2	2	3	3	ETE Locality 1506	Agate Spring Quarry	Harrison	Arikareean	no	very minor cysting	6.127.02
AMNH	181		22487	Rhinocerotidae	Menoceras	arikarense	ulna	limb bone	3	1	3	3	2	3	1	2	ETE Locality 1506	Agate Spring Quarry	Harrison	Arikareean	no		6.127.05
AMNH	232		144597	Rhinocerotidae	Menoceras	arikarense	ulna	limb bone	2	1	2	2	2	3	1	3	ETE Locality 1506	Agate Spring Quarry	Harrison	Arikareean	yes	cysting and lineation in area below olecranon articulation; distal cysting	6.139.07
AMNH	233		144598	Rhinocerotidae	Menoceras	arikarense	ulna	limb bone	2	1	2	2	2	2	1	3	ETE Locality 1506	Agate Spring Quarry	Harrison	Arikareean	no	minor cysting	6.139.05
AMNH	234		144599	Rhinocerotidae	Menoceras	arikarense	ulna	limb bone	2	1	2	1	2	2	2	3	ETE Locality 1506	Agate Spring Quarry	Harrison	Arikareean	no		6.139.05
AMNH	235		144600	Rhinocerotidae	Menoceras	arikarense	ulna	limb bone	3	1	2	2	3	3	2	3	ETE Locality 1506	Agate Spring Quarry	Harrison	Arikareean		Agate Spring Quarry	6.139.05
AMNH	237		144602	Rhinocerotidae	Menoceras	arikarense	ulna	limb bone	3	1	2	3	3	3	1	3	ETE Locality 1506	Agate Spring Quarry	Harrison	Arikareean
AMNH	238		144603	Rhinocerotidae	Menoceras	arikarense	ulna	limb bone	3	1	3	3	3	3	1	3	ETE Locality 1506	Agate Spring Quarry	Harrison	Arikareean
AMNH	239		144604	Rhinocerotidae	Menoceras	arikarense	ulna	limb bone	2	1	2	1	1	3	1	3	ETE Locality 1506	Agate Spring Quarry	Harrison	Arikareean
AMNH	240		144605	Rhinocerotidae	Menoceras	arikarense	ulna	limb bone	3	1	3	3	2	3	2	3	ETE Locality 1506	Agate Spring Quarry	Harrison	Arikareean
AMNH	241		144606	Rhinocerotidae	Menoceras	arikarense	ulna	limb bone	3	1	3	3	3	3	2	4	ETE Locality 1506	Agate Spring Quarry	Harrison	Arikareean
AMNH	242		144607	Rhinocerotidae	Menoceras	arikarense	ulna	limb bone	2	1	2	1	2	3	1	2	ETE Locality 1506	Agate Spring Quarry	Harrison	Arikareean
AMNH	243		144608	Rhinocerotidae	Menoceras	arikarense	ulna	limb bone	3	1	3	2	3	3	1	2	ETE Locality 1506	Agate Spring Quarry	Harrison	Arikareean
AMNH	214		144580	Rhinocerotidae	Menoceras	arikarense	humerus	limb bone	3	2	2	3	2	3	2	2	ETE Locality 1506	Agate Spring Quarry	Harrison	Arikareean	no	Kelsey'd say 'not'	6.139.01
AMNH	216		144581	Rhinocerotidae	Menoceras	arikarense	humerus	limb bone	2	1	2	3	1	3	1	3	ETE Locality 1506	Agate Spring Quarry	Harrison	Arikareean	no	minor cysting	6.139.02
AMNH	217		144582	Rhinocerotidae	Menoceras	arikarense	humerus	limb bone	3	1	2	2	2	2	2	3	ETE Locality 1506	Agate Spring Quarry	Harrison	Arikareean	no		6.139.02
AMNH	218		144583	Rhinocerotidae	Menoceras	arikarense	humerus	limb bone	3	1	2	1	2	2	2	3	ETE Locality 1506	Agate Spring Quarry	Harrison	Arikareean	yes	cysting on both ends + olecranon fossa, some lipping; none on articular surfaces	6.139.01
AMNH	220		144585	Rhinocerotidae	Menoceras	arikarense	humerus	limb bone	2	3	3	3	3	3	1	3	ETE Locality 1506	Agate Spring Quarry	Harrison	Arikareean
AMNH	221		144586	Rhinocerotidae	Menoceras	arikarense	humerus	limb bone	3	2	2	3	2	3	1	3	ETE Locality 1506	Agate Spring Quarry	Harrison	Arikareean
AMNH	222		144587	Rhinocerotidae	Menoceras	arikarense	humerus	limb bone	3	2	3	3	2	3	1	2	ETE Locality 1506	Agate Spring Quarry	Harrison	Arikareean
AMNH	223		144588	Rhinocerotidae	Menoceras	arikarense	humerus	limb bone	2	1	3	1	2	3	1	2	ETE Locality 1506	Agate Spring Quarry	Harrison	Arikareean
AMNH	224		144589	Rhinocerotidae	Menoceras	arikarense	humerus	limb bone	2	2	2	1	2	3	2	4	ETE Locality 1506	Agate Spring Quarry	Harrison	Arikareean
AMNH	225		144590	Rhinocerotidae	Menoceras	arikarense	humerus	limb bone	2	2	2	1	2	2	1	2	ETE Locality 1506	Agate Spring Quarry	Harrison	Arikareean
AMNH	226		144591	Rhinocerotidae	Menoceras	arikarense	humerus	limb bone	2	2	2	1	2	2	1	4	ETE Locality 1506	Agate Spring Quarry	Harrison	Arikareean
AMNH	227		144592	Rhinocerotidae	Menoceras	arikarense	humerus	limb bone	2	2	2	1	3	3	1	3	ETE Locality 1506	Agate Spring Quarry	Harrison	Arikareean
AMNH	228		144593	Rhinocerotidae	Menoceras	arikarense	humerus	limb bone	2	1	2	2	2	3	2	4	ETE Locality 1506	Agate Spring Quarry	Harrison	Arikareean
AMNH	229		144594	Rhinocerotidae	Menoceras	arikarense	humerus	limb bone	2	1	2	3	3	3	2	4	ETE Locality 1506	Agate Spring Quarry	Harrison	Arikareean
AMNH	230		144595	Rhinocerotidae	Menoceras	arikarense	humerus	limb bone	2	1	2	2	2	3	2	4	ETE Locality 1506	Agate Spring Quarry	Harrison	Arikareean
AMNH	231		144596	Rhinocerotidae	Menoceras	arikarense	humerus	limb bone	2	1	2	2	3	3	1	4	ETE Locality 1506	Agate Spring Quarry	Harrison	Arikareean
AMNH	244		144609	Rhinocerotidae	Menoceras	arikarense	radius	limb bone	2	1	2	1	3	3	1	3	ETE Locality 1506	Agate Spring Quarry	Harrison	Arikareean	no	minor cysting	6.139.08
AMNH	245		144610	Rhinocerotidae	Menoceras	arikarense	radius	limb bone	2	1	2	1	3	3	1	3	ETE Locality 1506	Agate Spring Quarry	Harrison	Arikareean	no		6.139.08
AMNH	246		144611	Rhinocerotidae	Menoceras	arikarense	radius	limb bone	2	1	2	3	3	3	1	4	ETE Locality 1506	Agate Spring Quarry	Harrison	Arikareean	no		6.140.01
AMNH	247		144612	Rhinocerotidae	Menoceras	arikarense	radius	limb bone	1	2	1	1	1	1	1	3	ETE Locality 1506	Agate Spring Quarry	Harrison	Arikareean	no	minor cysting	6.140.01
AMNH	250		144616	Rhinocerotidae	Menoceras	arikarense	radius	limb bone	2	2	3	1	2	2	1	3	ETE Locality 1506	Agate Spring Quarry	Harrison	Arikareean	yes	juvenile, unfused distal, but major cysting on proximal end	6.139.08
AMNH	249		144613	Rhinocerotidae	Menoceras	arikarense	radius- bottom	limb bone	1	1	1	1	1	1	1	3	ETE Locality 1506	Agate Spring Quarry	Harrison	Arikareean	yes	major lipping on the distal end	6.139.08
AMNH	249		144614	Rhinocerotidae	Menoceras	arikarense	radius- middle	limb bone	2	2	2	1	2	3	1	3	ETE Locality 1506	Agate Spring Quarry	Harrison	Arikareean	no	minor cysting	6.140.02
AMNH	249		144615	Rhinocerotidae	Menoceras	arikarense	radius- top	limb bone	2	2	2	2	3	3	1	3	ETE Locality 1506	Agate Spring Quarry	Harrison	Arikareean	no		6.140.02
AMNH	252		144617	Rhinocerotidae	Menoceras	arikarense	radius- bottom	limb bone	2	2	2	1	2	3	1	3	ETE Locality 1506	Agate Spring Quarry	Harrison	Arikareean
AMNH	252		144618	Rhinocerotidae	Menoceras	arikarense	radius- middle	limb bone	2	1	3	2	4	4	1	3	ETE Locality 1506	Agate Spring Quarry	Harrison	Arikareean
AMNH	252		144619	Rhinocerotidae	Menoceras	arikarense	radius- top	limb bone	2	2	2	2	1	3	1	2	ETE Locality 1506	Agate Spring Quarry	Harrison	Arikareean	yes		6.140.01
AMNH	253		144622	Rhinocerotidae	Menoceras	arikarense	radius- bottom	limb bone	2	1	2	1	2	3	1	3	ETE Locality 1506	Agate Spring Quarry	Harrison	Arikareean
AMNH	253		144621	Rhinocerotidae	Menoceras	arikarense	radius- middle	limb bone	2	1	2	2	2	3	1	4	ETE Locality 1506	Agate Spring Quarry	Harrison	Arikareean
AMNH	253		144620	Rhinocerotidae	Menoceras	arikarense	radius- top	limb bone	2	1	2	1	2	2	1	4	ETE Locality 1506	Agate Spring Quarry	Harrison	Arikareean
AMNH	254		144623	Rhinocerotidae	Menoceras	arikarense	radius- top	limb bone	1	1	2	2	1	2	1	3	ETE Locality 1506	Agate Spring Quarry	Harrison	Arikareean
AMNH	254		144625	Rhinocerotidae	Menoceras	arikarense	radius- middle	limb bone	2	2	2	1	2	2	1	2	ETE Locality 1506	Agate Spring Quarry	Harrison	Arikareean
AMNH	254		144624	Rhinocerotidae	Menoceras	arikarense	radius- bottom	limb bone	3	2	3	1	2	2	1	3	ETE Locality 1506	Agate Spring Quarry	Harrison	Arikareean
AMNH	392, 394		144633	Rhinocerotidae	Menoceras	arikarense	femur- lower	limb bone	2	1	2	1	2	3	2	4	ETE Locality 1506	Agate Spring Quarry	Harrison	Arikareean	no		6.143.04
AMNH	392, 393		144634	Rhinocerotidae	Menoceras	arikarense	femur- upper	limb bone	3	1	2	2	3	3	3	3	ETE Locality 1506	Agate Spring Quarry	Harrison	Arikareean	no		6.143.03
AMNH	394, 395		144635	Rhinocerotidae	Menoceras	arikarense	tibia	limb bone	2	2	3	3	3	3	2	3	ETE Locality 1506	Agate Spring Quarry	Harrison	Arikareean	no	some slight cysting on proximal surface between condyles	6.144.06
AMNH	396, 397		144636	Rhinocerotidae	Menoceras	arikarense	fibula	limb bone	2	2	3	1	2	2	1	2	ETE Locality 1506	Agate Spring Quarry	Harrison	Arikareean	no		6.145.03
AMNH	219		144584	Rhinocerotidae	Menoceras	arikarense	humerus	limb bone	2	1	2	3	3	3	1	4	ETE Locality 1506	Agate Spring Quarry	Harrison	Arikareean	yes	cysting and overgrowth; Definite 'yes'	6.139.02
AMNH	197		86090	Rhinocerotidae	Menoceras	arikarense	partial metapodials	metapodial	2	2	2	1	2	2	2	4	ETE Locality 1506	Agate Spring Quarry	Harrison	Arikareean	no		6.132.02
AMNH	380, 381		144626	Rhinocerotidae	Menoceras	arikarense	metapodial- left	metapodial	2	2	3	2	2	3	1	2	ETE Locality 1506	Agate Spring Quarry	Harrison	Arikareean
AMNH	380, 381		144627	Rhinocerotidae	Menoceras	arikarense	metapodial- middle	metapodial	1	1	1	1	2	2	1	3	ETE Locality 1506	Agate Spring Quarry	Harrison	Arikareean
AMNH	380, 381		144628	Rhinocerotidae	Menoceras	arikarense	metapodial- right	metapodial	2	1	2	3	2	3	2	2	ETE Locality 1506	Agate Spring Quarry	Harrison	Arikareean
AMNH	201		86090	Rhinocerotidae	Menoceras	arikarense	left phalanx	phalanx	2	2	2	1	1	2	1	2	ETE Locality 1506	Agate Spring Quarry	Harrison	Arikareean	no		6.132.02
AMNH	201		86091	Rhinocerotidae	Menoceras	arikarense	right phalanx	phalanx	3	2	2	1	1	1	1	2	ETE Locality 1506	Agate Spring Quarry	Harrison	Arikareean
AMNH	203		86092	Rhinocerotidae	Menoceras	arikarense	phalanx	phalanx	2	1	2	1	1	1	1	2	ETE Locality 1506	Agate Spring Quarry	Harrison	Arikareean
AMNH	382, 383		144629	Rhinocerotidae	Menoceras	arikarense	phalanx- far left	phalanx	4	2	4	2	2	3	1	1	ETE Locality 1506	Agate Spring Quarry	Harrison	Arikareean
AMNH	382, 386		144632	Rhinocerotidae	Menoceras	arikarense	phalanx- far right	phalanx	1	1	1	1	1	1	1	1	ETE Locality 1506	Agate Spring Quarry	Harrison	Arikareean
AMNH	382, 384		144630	Rhinocerotidae	Menoceras	arikarense	phalanx- middle left	phalanx	3	2	2	2	2	2	1	1	ETE Locality 1506	Agate Spring Quarry	Harrison	Arikareean
AMNH	382, 385		144631	Rhinocerotidae	Menoceras	arikarense	phalanx- middle right	phalanx	2	1	1	1	2	2	1	1	ETE Locality 1506	Agate Spring Quarry	Harrison	Arikareean
AMNH	202		86090	Rhinocerotidae	Menoceras	arikarense	astragalus	podial	1	1	1	1	1	1	2	2	ETE Locality 1506	Agate Spring Quarry	Harrison	Arikareean	no	a few cysts on plantar surface	6.132.02
AMNH	196		86090	Rhinocerotidae	Menoceras	arikarense	calcaneum	podial	2	1	2	2	1	3	1	3	ETE Locality 1506	Agate Spring Quarry	Harrison	Arikareean	yes	cysting near articulation, striations	6.132.02
AMNH	199		86090	Rhinocerotidae	Menoceras	arikarense	podial	podial	3	2	3	3	2	3	3	2	ETE Locality 1506	Agate Spring Quarry	Harrison	Arikareean
AMNH	200		86090	Rhinocerotidae	Menoceras	arikarense	podial	podial	2	1	2	2	2	2	1	3	ETE Locality 1506	Agate Spring Quarry	Harrison	Arikareean
									2.18072	1.37349	2.15663	1.77108	2.01205	2.50602	1.31325	2.91566
UW	52334		52334	Rhinocerotidae	Diceratherium	niobrarense?	scapula	girdle	3	2	2	2	3	3	1	4	C0046 30' above resistant ledge		John Day Formation
UW	58203		58203	Rhinocerotidae	Diceratherium	niobrarense?	scapula	girdle	2	1	2	1	1	1	1	4	A4458-3	south canyon	John Day Formation	oligocene
UCMP	K129A, K129B	1	2289	Rhinocerotidae	Diceratherium	niobrarense?	pelvis frag	girdle	2	2	2	2	2	3	2	4	-898	Logan Butte	John Day Formation	Whitneyain	no		V388-7
UW	26414	8	26414	Rhinocerotidae	Diceratherium	niobrarense?	Patella	limb bone	2	1	4	2	2	2	1	4	A4459	Blue Basin	John Day Formation	Oligo-Mio
UW	26536		26536	Rhinocerotidae	Diceratherium	niobrarense?	Distal femur	limb bone	1	1	1	2	2	2	1	4	A4458		John Day Formation
UW	28151		28151	Rhinocerotidae	Diceratherium	niobrarense?	femoral head	limb bone	1	1	1	1	1	1	2	4	A4536-1		John Day Formation
UW	52334		52334	Rhinocerotidae	Diceratherium	niobrarense?	distal femur	limb bone	2	1	2	1	2	2	1	4	C0046 30' above resistant ledge		John Day Formation
UW	53301		53301	Rhinocerotidae	Diceratherium	niobrarense?	tibia	limb bone	2	1	2	1	1	1	1	4	C0282	picture gorge 14	John Day Formation
UW	53302		53302	Rhinocerotidae	Diceratherium	niobrarense?	proximal tibia	limb bone	1	1	2	2	3	3	1	4	C0285	picture gorge 51	John Day Formation
UW	53323		53323	Rhinocerotidae	Diceratherium	niobrarense?	tibia (juv)	limb bone	1	2	2	1	2	2	1	4	C0288	picture gorge 54	John Day Formation
UW	53324		53324	Rhinocerotidae	Diceratherium	niobrarense?	femur (juv)	limb bone	1	1	2	2	2	2	2	4	C0288	picture gorge 54	John Day Formation
UW	53325		53325	Rhinocerotidae	Diceratherium	niobrarense?	distal femur	limb bone	1	1	2	3	3	3	1	4	A4556	picture gorge 20	John Day Formation
UW	53430		53430	Rhinocerotidae	Diceratherium	niobrarense?	distal femur	limb bone	2	1	2	2	2	2	2	4	C0288	picture gorge 54	John Day Formation
UW	55086		55086	Rhinocerotidae	Diceratherium	niobrarense?	tibia	limb bone	2	1	2	2	2	2	1	3	C0116	North Wash Level 5	John Day Formation
UW	58755		58755	Rhinocerotidae	Diceratherium	niobrarense?	tibia	limb bone	2	1	2	1	2	2	1	4	A8875	Blue Canyon	John Day Formation
UW	58755		58755	Rhinocerotidae	Diceratherium	niobrarense?	limb bone	limb bone	2	1	2	2	1	1	1	4	A8875	Blue Canyon	John Day Formation
UW	58755		58755	Rhinocerotidae	Diceratherium	niobrarense?	limb bone	limb bone	2	1	2	1	1	1	1	4	A8875	Blue Canyon	John Day Formation
UW	533315		533315	Rhinocerotidae	Diceratherium	niobrarense?	humerus	limb bone	1	1	2	1	1	1	1	4	A9591	picture gorge 12	John Day Formation	miocene
UCMP	K125A, K125B	1	145	Rhinocerotidae	Diceratherium	niobrarense?	Distal end of femur and podial?	limb bone	2	2	2	1	1	1	2	4	V76102	John Day Whitneyan General		Whitneyan	no		V243-6
UCMP	K122A, K122B	1	566	Rhinocerotidae	Diceratherium	niobrarense?	Proximal Radioulna	limb bone	2	1	2	1	2	2	1	4	V76102	John Day Whitneyan General		Whitneyan	no	check	V243-6
UCMP	K148A, K148B	1	75260	Rhinocerotidae	Diceratherium	niobrarense?	proximal humerus	limb bone	2	2	3	2	3	3	2	4	V6630	South Canyon 2	John Day Formation	Whitneyain	no		V240-8
UCMP	K146A, K146B, K146C, K146D, K146E	2	75261	Rhinocerotidae	Diceratherium	niobrarense?	Articulating Distal Humerus	limb bone	2	2	2	1	1	1	1	4	V6630	South Canyon 2	John Day Formation	Whitneyain	yes	cysting	V240-8
UCMP	K147A, K147B	1	75261	Rhinocerotidae	Diceratherium	niobrarense?	proximal humerus	limb bone	2	1	2	2	2	2	1	4	V6630	South Canyon 2	John Day Formation	Whitneyain	no		V240-8
UCMP	K149A, K149B	1	75282	Rhinocerotidae	Diceratherium	niobrarense?	femur	limb bone	3	2	3	4	3	3	2	3	V6630	South Canyon 2	John Day Formation	Whitneyain	no		V240-8
UCMP	K130A, K130B	1	M1691	Rhinocerotidae	Diceratherium	niobrarense?	distal femur	limb bone	3	2	2	1	1	1	1	4	-898	Logan Butte	John Day Formation	Whitneyain	no		V388-7
UCMP	K138A, K138B	1	M1691	Rhinocerotidae	Diceratherium	niobrarense?	partial fibula(s)	limb bone	3	2	3	1	1	1	2	3	-898	Logan Butte	John Day Formation	Whitneyain	no		V388-7
UCMP	K131A, K121B, K121C	1	M1691	Rhinocerotidae	Diceratherium	niobrarense?	tibia	limb bone	3	2	3	3	2	2	1	3	-898	Logan Butte	John Day Formation	Whitneyain	no	maybe a bit of overgrowth and cysting	V388-7
UCMP	K139A, K139B, K139C, K139D	1	M2107	Rhinocerotidae	Diceratherium	niobrarense?	distal femur	limb bone	3	1	3	3	2	2	2	4	-906	Seigfried's 4	John Day Formation	Whitneyain	no		V239-3
UW	26563		26563	Rhinocerotidae	Diceratherium	niobrarense?	distal metapodial	metapodial	2	2	2	1	1	1	2	4	A4459		John Day Formation
UW	26879		26879	Rhinocerotidae	Diceratherium	niobrarense?	distal metapodial	metapodial	2	2	2	1	2	3	1	3	A4459		John Day Formation
UW	43529		43529	Rhinocerotidae	Diceratherium	niobrarense?	metatarsal	metapodial	3	2	3	1	1	1	1	2	A4556 PG-20		John Day Formation
UW	52334		52334	Rhinocerotidae	Diceratherium	niobrarense?	metapodial	metapodial	2	1	2	1	2	2	1	3	C0046 30' above resistant ledge	picture gorge	John Day Formation	miocene
UW	52334		52334	Rhinocerotidae	Diceratherium	niobrarense?	distal metapodial	metapodial	1	1	2	1	1	1	1	3	C0046 30' above resistant ledge		John Day Formation
UW	53322		53322	Rhinocerotidae	Diceratherium	niobrarense?	metapodial	metapodial	1	2	3	2	2	2	1	3	C0095	picture gorge 16	John Day Formation	miocene
UW	55086		55086	Rhinocerotidae	Diceratherium	niobrarense?	metatarsal	metapodial	1	1	2	2	3	3	1	2	C0116	North Wash Level 5	John Day Formation
UCMP	K123A, K123B	1	145	Rhinocerotidae	Diceratherium	niobrarense?	R MT3	metapodial	2	3	2	1	1	1	2	4	V76102	John Day Whitneyan General		Whitneyan	no		V243-6
UCMP	K137A, K137B	1	M1691	Rhinocerotidae	Diceratherium	niobrarense?	left metapodial	metapodial	3	3	3	1	1	1	2	3	-898	Logan Butte	John Day Formation	Whitneyain
UCMP	K133A, K133B	1	M1691	Rhinocerotidae	Diceratherium	niobrarense?	metapodial	metapodial	2	2	2	3	2	2	1	3	-898	Logan Butte	John Day Formation	Whitneyain	no		V388-7
UCMP	K134A, K134B	1	M1691	Rhinocerotidae	Diceratherium	niobrarense?	metapodial	metapodial	2	2	3	3	2	3	2	3	-898	Logan Butte	John Day Formation	Whitneyain	no		V388-7
UCMP	K135A, K135B	1	M1691	Rhinocerotidae	Diceratherium	niobrarense?	metapodial	metapodial	2	2	2	1	1	1	1	3	-898	Logan Butte	John Day Formation	Whitneyain	no		V388-7
UCMP	K137A, K137B	1	M1691	Rhinocerotidae	Diceratherium	niobrarense?	middle metapodial	metapodial	3	2	4	1	1	1	2	3	-898	Logan Butte	John Day Formation	Whitneyain
UCMP	K137A, K137B	1	M1691	Rhinocerotidae	Diceratherium	niobrarense?	right metapodial	metapodial	2	1	2	3	3	3	1	3	-898	Logan Butte	John Day Formation	Whitneyain	yes	smores	V388-7
UW	52334		52334	Rhinocerotidae	Diceratherium	niobrarense?	phalanx	phalanx	3	2	3	2	2	2	1	1	C0046 30' above resistant ledge		John Day Formation
UW	52334		52334	Rhinocerotidae	Diceratherium	niobrarense?	phalanx	phalanx	2	2	2	1	1	1	1	1	C0046 30' above resistant ledge		John Day Formation
UW	53322		53322	Rhinocerotidae	Diceratherium	niobrarense?	phalanx	phalanx	2	2	2	2	2	2	1	2	C0095	picture gorge 16	John Day Formation
UCMP	K128A, K128B	1	788	Rhinocerotidae	Diceratherium	niobrarense?	phalanx	phalanx	2	2	3	1	2	2	2	2	V76102	John Day Whitneyan General		Whitneyan	yes		V243-6
UCMP	K142A, K142B	1	75403	Rhinocerotidae	Diceratherium	niobrarense?	Medial Phalanx	phalanx	3	1	3	3	3	3	2	2	V6630	South Canyon 2	John Day Formation	Whitneyain	yes	cysting	V242-4
UCMP	K136A, K136B	1	M1691	Rhinocerotidae	Diceratherium	niobrarense?	left phalanx	phalanx	2	3	2	1	1	1	2	2	-898	Logan Butte	John Day Formation	Whitneyain	no		V388-7
UCMP	K136A, K136B	1	M1691	Rhinocerotidae	Diceratherium	niobrarense?	middle phalanx	phalanx	3	2	3	1	1	1	2	2	-898	Logan Butte	John Day Formation	Whitneyain
UCMP	K136A, K136B	1	M1691	Rhinocerotidae	Diceratherium	niobrarense?	right phalanx	phalanx	2	2	3	1	1	1	1	2	-898	Logan Butte	John Day Formation	Whitneyain
UCMP	K124A, K124B	1		Rhinocerotidae	Diceratherium	niobrarense?	phalanx	phalanx	4	2	4	1	1	1	1	2	V76102	John Day Whitneyan General		Whitneyan	no		V243-6
UW	52334		52334	Rhinocerotidae	Diceratherium	niobrarense?	podial	podial	3	3	2	2	2	2	1	2	C0046 30' above resistant ledge		John Day Formation
UW	52334		52334	Rhinocerotidae	Diceratherium	niobrarense?	podial	podial	2	1	2	1	1	1	1	2	C0046 30' above resistant ledge		John Day Formation
UW	53322		53322	Rhinocerotidae	Diceratherium	niobrarense?	podial	podial	3	2	3	3	2	2	1	2	C0095	picture gorge 16	John Day Formation
UW	53322		53322	Rhinocerotidae	Diceratherium	niobrarense?	podial	podial	3	2	3	2	2	2	1	2	C0095	picture gorge 16	John Day Formation
UW	54947		54947	Rhinocerotidae	Diceratherium	niobrarense?	astragalus and partial calcanium	podial	1	1	2	1	2	2	1	1	C0191	picture gorge 8 6' up	John Day Formation
UW	54947		54947	Rhinocerotidae	Diceratherium	niobrarense?	podial	podial	2	1	2	1	2	2	1	1	C0191	picture gorge 8 6' up	John Day Formation
UW	54947		54947	Rhinocerotidae	Diceratherium	niobrarense?	podial	podial	1	1	2	1	1	1	1	1	C0191	picture gorge 8 6' up	John Day Formation
UW	55086		55086	Rhinocerotidae	Diceratherium	niobrarense?	podial	podial	1	1	2	2	3	3	1	1	C0116	North Wash Level 5	John Day Formation
UW	55086		55086	Rhinocerotidae	Diceratherium	niobrarense?	podial	podial	2	1	2	1	2	2	1	1	C0116	North Wash Level 5	John Day Formation
UW	75665		75665	Rhinocerotidae	Diceratherium	niobrarense?	distal podial	podial	3	2	3	2	3	3	2	3	A9596	picture gorge 29	John Day Formation	oligocene
UCMP	K127A, K127B	1	788	Rhinocerotidae	Diceratherium	niobrarense?	tarsal	podial	3	2	3	3	2	3	2	1	V76102	John Day Whitneyan General		Whitneyan	yes	cool pic	V243-6
UCMP	K143A, K142B	1	75033	Rhinocerotidae	Diceratherium	niobrarense?	Navicular	podial	3	3	4	3	3	3	3	2	V6630	South Canyon 2	John Day Formation	Whitneyain	yes	some cysting and smores	V242-4
UCMP	K144A, K144B	1	75035	Rhinocerotidae	Diceratherium	niobrarense?	lunar	podial	2	1	2	2	3	3	1	2	V6630	South Canyon 2	John Day Formation	Whitneyain	yes	cysting	V242-4
UCMP	K141A, K141B	1	75120	Rhinocerotidae	Diceratherium	niobrarense?	astragalus	podial	2	2	2	3	3	3	1	2	V6630	South Canyon 2	John Day Formation	Whitneyain	yes	cysting	V242-4
UCMP	K151A, K151B	1	76104	Rhinocerotidae	Diceratherium	niobrarense?	left podial	podial	2	2	3	2	2	2	1	3	V6630	South Canyon 2	John Day Formation	Whitneyain	no		V240-8
UCMP	K151A, K151B	1	76104	Rhinocerotidae	Diceratherium	niobrarense?	right podial	podial	2	2	3	2	2	2	1	3	V6630	South Canyon 2	John Day Formation	Whitneyain
UCMP	K150A, K150B	1	75260, 75348, 76104	Rhinocerotidae	Diceratherium	niobrarense?	left podial	podial	2	1	2	1	2	2	1	1	V6630	South Canyon 2	John Day Formation	Whitneyain
UCMP	K150A, K150B	1	75260, 75348, 76104	Rhinocerotidae	Diceratherium	niobrarense?	middle podial	podial	2	1	2	2	2	2	1	1	V6630	South Canyon 2	John Day Formation	Whitneyain
UCMP	K150A, K150B	1	75260, 75348, 76104	Rhinocerotidae	Diceratherium	niobrarense?	right podial	podial	2	2	3	1	2	2	1	1	V6630	South Canyon 2	John Day Formation	Whitneyain	yes		V240-8
UCMP	K132A, K132B, K132C, K132D, K132E	1	M1691	Rhinocerotidae	Diceratherium	niobrarense?	articulated astragalus and calcaneum	podial	3	2	3	3	3	1	1	3	-898	Logan Butte	John Day Formation	Whitneyain	no		V388-7
UW	58755		58755	Rhinocerotidae	Diceratherium	niobrarense?	centrum	vertebrae	1	1	1	1	1	1	1	4	A8875	Blue Canyon	John Day Formation
									2.09722	1.61111	2.375	1.69444	1.84722	1.875	1.30556	2.84722
UCMP	K112A, K112B, K112C, K112D	1	22552	Rhinocerotidae	Aphelops	mutilis	L Femur	limb bone	3	1	2	2	3	4	2	3	V2823	Coffee Ranch Quarry 2	Ogalla Group	Hemphilian	yes		V36-5
UCMP	K120A, K120B	1	30166	Rhinocerotidae	Aphelops	mutilis	tibia	limb bone	3	2	3	4	4	4	2	2	V2824	Higgins Quarry A	Ogalla Group	Hemphilian	yes	some cysting	V372-4
UCMP	K82A, K82B	1	30266	Rhinocerotidae	Aphelops	mutilis	dist end of ulna	limb bone	3	1	3	4	4	4	1	4	V2823	Coffee Ranch Quarry 2	Ogalla Group	Hemphilian	yes		V369-2
UCMP	K77A, K77B, K77C	1	30266	Rhinocerotidae	Aphelops	mutilis	distal humerus	limb bone	2	2	3	4	4	4	partially eroded		V2823	Coffee Ranch Quarry 2	Ogalla Group	Hemphilian	yes	overgrowth, nodules, dendritic appearance
UCMP	K111A, K111B	1	30266	Rhinocerotidae	Aphelops	mutilis	L Femur	limb bone	2	1	2	4	3	4	3	3	V2823	Coffee Ranch Quarry 2	Ogalla Group	Hemphilian	no		V36-5
UCMP	K116A, K116B	1	30266	Rhinocerotidae	Aphelops	mutilis	partial tibia- upper	limb bone	3	1	3	3	3	3	3	2	V2823	Coffee Ranch Quarry 2	Ogalla Group	Hemphilian	yes		V36-7
UCMP	K115A, K115B	1	30266	Rhinocerotidae	Aphelops	mutilis	patella- left	limb bone	2	1	1	4	3	4	2	3	V2823	Coffee Ranch Quarry 2	Ogalla Group	Hemphilian	no		V36-7
UCMP	K118A, K118B, K188C, K188D, K188E	1	30266	Rhinocerotidae	Aphelops	mutilis	tibia	limb bone	3	2	2	4	4	4	4	4	V2823	Coffee Ranch Quarry 2	Ogalla Group	Hemphilian		EBURNATION	V36-7
UCMP	K78A, K78B	1	30266	Rhinocerotidae	Aphelops	mutilis	tibia?	limb bone	2	1	3	4	3	4	1	3	V2823	Coffee Ranch Quarry 2	Ogalla Group	Hemphilian	yes		V369-2
UCMP	K80A, K80B	1	30266	Rhinocerotidae	Aphelops	mutilis	ulna	limb bone	3	1	3	1	2	3	1	4	V2823	Coffee Ranch Quarry 2	Ogalla Group	Hemphilian	yes		V369-2
UCMP	K81A, K81B	1	30266	Rhinocerotidae	Aphelops	mutilis	ulna?	limb bone	2	1	2	1	2	3	1	4	V2823	Coffee Ranch Quarry 2	Ogalla Group	Hemphilian	no	not sure if two specimens or one broken	V369-2
UCMP	K116A, K116B	1	30267	Rhinocerotidae	Aphelops	mutilis	partial tibia- lower	limb bone	3	1	3	2	3	3	3	2	V2823	Coffee Ranch Quarry 2	Ogalla Group	Hemphilian	no
UCMP	K115A, K115B	1	30267	Rhinocerotidae	Aphelops	mutilis	patella- middle	limb bone	2	1	2	4	3	3	2	3	V2823	Coffee Ranch Quarry 2	Ogalla Group	Hemphilian	no
UCMP	K115A, K115B	1	30268	Rhinocerotidae	Aphelops	mutilis	patella- right	limb bone	2	1	1	3	3	4	2	3	V2823	Coffee Ranch Quarry 2	Ogalla Group	Hemphilian
UCMP	K121A, K121B	1	30612	Rhinocerotidae	Aphelops	mutilis	femur	limb bone	3	1	2	2	3	3	2	4	V2824	Higgins Quarry A	Ogalla Group	Hemphilian	yes	calcified tendon?	V372-4
UCMP	K119A, K199B	1	30613	Rhinocerotidae	Aphelops	mutilis	humerus	limb bone	3	1	3	4	4	4	3	4	V2824	Higgins Quarry A	Ogalla Group	Hemphilian	yes	some cysting	V372-4
UCMP	K79A, K79B	1	31117	Rhinocerotidae	Aphelops	mutilis	ulna	limb bone	3	1	3	3	3	4	1	1	V2823	Coffee Ranch Quarry 2	Ogalla Group	Hemphilian	yes		V369-2
UCMP	K117A, K117B, K117C	1	31118	Rhinocerotidae	Aphelops	mutilis	tibia	limb bone	3	2	3	4	4	4	2	3	V2823	Coffee Ranch Quarry 2	Ogalla Group	Hemphilian	yes	tendon calcification?	V36-7
UCMP	K76A, K76B	1	31119	Rhinocerotidae	Aphelops	mutilis	humerus	limb bone	3	2	3	1	3	3	partially eroded	3	V2823	Coffee Ranch Quarry 2	Ogalla Group	Hemphilian	no	not much visible, proximal end very worn down
UCMP	K73A, K73B, K73C, K73D	1	31120	Rhinocerotidae	Aphelops	mutilis	humerus	limb bone	2	2	2	3	3	3	partially eroded	3	V2823	Coffee Ranch Quarry 2	Ogalla Group	Hemphilian	yes		V369-1
UCMP	K75A, K75B	1	31121	Rhinocerotidae	Aphelops	mutilis	humerus	limb bone	3	1	3	3	3	3	partially eroded	3	V2823	Coffee Ranch Quarry 2	Ogalla Group	Hemphilian	yes		V369-1
UCMP	K74A, K74B, K74C, K74D	1	31122	Rhinocerotidae	Aphelops	mutilis	humerus	limb bone	3	1	3	3	3	4	partially eroded	3	V2823	Coffee Ranch Quarry 2	Ogalla Group	Hemphilian	yes		V369-1
UCMP	k114A, K114B	1	31127	Rhinocerotidae	Aphelops	mutilis	patella- upper left	limb bone	2	1	2	1	3	3	1	3	V2823	Coffee Ranch Quarry 2	Ogalla Group	Hemphilian	yes
UCMP	k114A, K114B	1	31128	Rhinocerotidae	Aphelops	mutilis	patella- lower left	limb bone	2	1	2	1	3	3	2	2	V2823	Coffee Ranch Quarry 2	Ogalla Group	Hemphilian	yes
UCMP	k114A, K114B	1	31129	Rhinocerotidae	Aphelops	mutilis	patella- right	limb bone	2	1	2	1	3	3	2	2	V2823	Coffee Ranch Quarry 2	Ogalla Group	Hemphilian	yes
UCMP	K91A, K91B	4	30266	Rhinocerotidae	Aphelops	mutilis	broken MC- bottom left	metapodial	2	1	2	1	2	3	1	4	V2823	Coffee Ranch Quarry 2	Ogalla Group	Hemphilian	yes		V369-3
UCMP	K91A, K91B	4	30266	Rhinocerotidae	Aphelops	mutilis	broken MC- bottom right	metapodial	3	2	2	2	3	4	1	3	V2823	Coffee Ranch Quarry 2	Ogalla Group	Hemphilian	yes		V369-3
UCMP	K91A, K91B	4	30266	Rhinocerotidae	Aphelops	mutilis	broken MC- upper left	metapodial	2	3	2	4	4	4	1	3	V2823	Coffee Ranch Quarry 2	Ogalla Group	Hemphilian	yes		V369-3
UCMP	K91A, K91B	4	30266	Rhinocerotidae	Aphelops	mutilis	broken MC- upper right	metapodial	2	1	1	1	3	3	1	3	V2823	Coffee Ranch Quarry 2	Ogalla Group	Hemphilian	yes		V369-3
UCMP	K90A, K90B	1	30266	Rhinocerotidae	Aphelops	mutilis	MC	metapodial	2	1	1	3	2	2	1	3	V2823	Coffee Ranch Quarry 2	Ogalla Group	Hemphilian	no		V369-3
UCMP	K86A, K86B	1	30266	Rhinocerotidae	Aphelops	mutilis	MC	metapodial	3	2	3	4	3	3	2	2	V2823	Coffee Ranch Quarry 2	Ogalla Group	Hemphilian	yes		V369-3
UCMP	K88A, K88B	1	30266	Rhinocerotidae	Aphelops	mutilis	MC2	metapodial	3	3	2	2	3	3	2	2	V2823	Coffee Ranch Quarry 2	Ogalla Group	Hemphilian	yes	overgrowth	V369-3
UCMP	K89A, K89B	1	30266	Rhinocerotidae	Aphelops	mutilis	MC3	metapodial	3	3	2	2	2	3	1	2	V2823	Coffee Ranch Quarry 2	Ogalla Group	Hemphilian	no	unfused	V369-3
UCMP	K87A, K87B	1	30266	Rhinocerotidae	Aphelops	mutilis	MC4	metapodial	3	2	4	3	3	3	1	1	V2823	Coffee Ranch Quarry 2	Ogalla Group	Hemphilian	yes	interesting	V369-3
UCMP	K85A, K85B	1	31123	Rhinocerotidae	Aphelops	mutilis	MC	metapodial	3	2	2	3	3	4	2	2	V2823	Coffee Ranch Quarry 2	Ogalla Group	Hemphilian	no		V369-3
UCMP	K84A, K84B	1	31123	Rhinocerotidae	Aphelops	mutilis	MC	metapodial	2	1	3	4	3	4	some erosions	2	V2823	Coffee Ranch Quarry 2	Ogalla Group	Hemphilian	yes		V369-3
UCMP	K83A, K83B	1	31123	Rhinocerotidae	Aphelops	mutilis	MC3	metapodial	2	2	3	4	3	4	smooth	4	V2823	Coffee Ranch Quarry 2	Ogalla Group	Hemphilian	yes!		V369-3
UCMP	K100A, K100B	1	32066	Rhinocerotidae	Aphelops	mutilis	MT- far left	metapodial	2	1	2	4	3	4	1	4	V2823	Coffee Ranch Quarry 2	Ogalla Group	Hemphilian	yes	yes(mostly)	V369-6
UCMP	K97A, K97B, K97C	1	32066	Rhinocerotidae	Aphelops	mutilis	MT- left	metapodial	3	3	2	3	3	3	1	3	V2823	Coffee Ranch Quarry 2	Ogalla Group	Hemphilian	no		V369-6
UCMP	K99A, K99B	1	32066	Rhinocerotidae	Aphelops	mutilis	MT- lower left	metapodial	3	2	2	4	3	3	2	2	V2823	Coffee Ranch Quarry 2	Ogalla Group	Hemphilian
UCMP	K99A, K99B	1	32066	Rhinocerotidae	Aphelops	mutilis	MT- lower right	metapodial	3	2	33	4	1	3	1	4	V2823	Coffee Ranch Quarry 2	Ogalla Group	Hemphilian
UCMP	K97A, K97B, K97C	2	32066	Rhinocerotidae	Aphelops	mutilis	MT- right	metapodial	3	1	2	3	3	3	3	3	V2823	Coffee Ranch Quarry 2	Ogalla Group	Hemphilian	yes		V369-6
UCMP	K97A, K97B, K97C	2	32066	Rhinocerotidae	Aphelops	mutilis	MT- upper	metapodial	2	1	3	1	2	2	1	3	V2823	Coffee Ranch Quarry 2	Ogalla Group	Hemphilian	yes		V369-6
UCMP	K99A, K99B	1	32066	Rhinocerotidae	Aphelops	mutilis	MT- upper left	metapodial	3	2	2	1	3	3	1	3	V2823	Coffee Ranch Quarry 2	Ogalla Group	Hemphilian	yes		V369-6
UCMP	K99A, K99B	1	32066	Rhinocerotidae	Aphelops	mutilis	MT- upper right	metapodial	3	1	3	1	3	2	2	4	V2823	Coffee Ranch Quarry 2	Ogalla Group	Hemphilian
UCMP	K98A, K98B	1	32066	Rhinocerotidae	Aphelops	mutilis	MT4	metapodial	4	2	3	1	3	4	2	2	V2823	Coffee Ranch Quarry 2	Ogalla Group	Hemphilian	yes	good example of arthritis	V369-6
UCMP	K97A, K97B, K97C	2	32066	Rhinocerotidae	Aphelops	mutilis	MT-left	metapodial	2	2	3	1	2	2	1	3	V2823	Coffee Ranch Quarry 2	Ogalla Group	Hemphilian	yes		V369-6
UCMP	K97A, K97B, K97C	2	32066	Rhinocerotidae	Aphelops	mutilis	MT-lower	metapodial	3	1	1	3	3	3	1	2	V2823	Coffee Ranch Quarry 2	Ogalla Group	Hemphilian	yes		V369-6
UCMP	K100A, K100B	1	32067	Rhinocerotidae	Aphelops	mutilis	MT- middle left	metapodial	3	2	2	4	3	4	2	2	V2823	Coffee Ranch Quarry 2	Ogalla Group	Hemphilian
UCMP	K97A, K97B, K97C	1	32067	Rhinocerotidae	Aphelops	mutilis	MT- middle top	metapodial	2	1	2	3	3	3	1	3	V2823	Coffee Ranch Quarry 2	Ogalla Group	Hemphilian
UCMP	K101A, K101B	1	32067	Rhinocerotidae	Aphelops	mutilis	MT- upper middle	metapodial	3	2	3	3	3	4	1	4	V2823	Coffee Ranch Quarry 2	Ogalla Group	Hemphilian
UCMP	K97A, K97B, K97C	1	32068	Rhinocerotidae	Aphelops	mutilis	MT- middle bottom	metapodial	3	1	2	3	3	3	1	2	V2823	Coffee Ranch Quarry 2	Ogalla Group	Hemphilian
UCMP	K100A, K100B	1	32068	Rhinocerotidae	Aphelops	mutilis	MT- middle right	metapodial	3	2	3	4	3	4	3	2	V2823	Coffee Ranch Quarry 2	Ogalla Group	Hemphilian
UCMP	K101A, K101B	1	32068	Rhinocerotidae	Aphelops	mutilis	MT- upper right	metapodial	2	2	3	1	3	3	1	4	V2823	Coffee Ranch Quarry 2	Ogalla Group	Hemphilian
UCMP	K109A, K109B	1	30266	Rhinocerotidae	Aphelops	mutilis	thrid phalanx- top row right	phalanx	4	4	4	4	4	4	1	2	V2823	Coffee Ranch Quarry 2	Ogalla Group	Hemphilian	yes	struts, smores, lipping, cysts	V369-6
UCMP	K109A, K109B	1	30267	Rhinocerotidae	Aphelops	mutilis	phalanx- middle row far left	phalanx	4	3	4	3	2	4	1	2	V2823	Coffee Ranch Quarry 2	Ogalla Group	Hemphilian	yes
UCMP	K109A, K109B	1	30268	Rhinocerotidae	Aphelops	mutilis	phalanx- middle row middle left	phalanx	3	3	3	3	2	4	1	2	V2823	Coffee Ranch Quarry 2	Ogalla Group	Hemphilian	yes
UCMP	K109A, K109B	1	30269	Rhinocerotidae	Aphelops	mutilis	phalanx- middle row middle right	phalanx	3	3	3	1	3	3	1	2	V2823	Coffee Ranch Quarry 2	Ogalla Group	Hemphilian	yes
UCMP	K109A, K109B	1	30270	Rhinocerotidae	Aphelops	mutilis	phalanx- middle row far right	phalanx	2	3	2	3	2	3	1	2	V2823	Coffee Ranch Quarry 2	Ogalla Group	Hemphilian	yes
UCMP	K109A, K109B	1	30271	Rhinocerotidae	Aphelops	mutilis	phalanx- lower row far left	phalanx	3	3	4	3	2	4	1	2	V2823	Coffee Ranch Quarry 2	Ogalla Group	Hemphilian	yes
UCMP	K109A, K109B	1	30272	Rhinocerotidae	Aphelops	mutilis	phalanx- lower row middle left	phalanx	2	3	4	1	3	3	1	2	V2823	Coffee Ranch Quarry 2	Ogalla Group	Hemphilian	yes
UCMP	K109A, K109B	1	30273	Rhinocerotidae	Aphelops	mutilis	phalanx- lower row middle	phalanx	3	3	4	1	3	3	1	2	V2823	Coffee Ranch Quarry 2	Ogalla Group	Hemphilian	yes
UCMP	K109A, K109B	1	30274	Rhinocerotidae	Aphelops	mutilis	phalanx- lower row middle right	phalanx	2	2	2	1	2	3	1	2	V2823	Coffee Ranch Quarry 2	Ogalla Group	Hemphilian	yes
UCMP	K109A, K109B	1	30275	Rhinocerotidae	Aphelops	mutilis	Phalanx- lower row far right	phalanx	2	2	2	1	2	3	1	2	V2823	Coffee Ranch Quarry 2	Ogalla Group	Hemphilian	yes
UCMP	K110A, K110B	1	31127	Rhinocerotidae	Aphelops	mutilis	phalanx- upper far left	phalanx	4	3	4	3	4	4	1	1	V2823	Coffee Ranch Quarry 2	Ogalla Group	Hemphilian	yes		V369-6
UCMP	K110A, K110B	1	31128	Rhinocerotidae	Aphelops	mutilis	phalanx- upper middle left	phalanx	3	3	3	2	3	3	1	2	V2823	Coffee Ranch Quarry 2	Ogalla Group	Hemphilian	yes
UCMP	K110A, K110B	1	31129	Rhinocerotidae	Aphelops	mutilis	phalanx- upper middle right	phalanx	3	3	4	2	3	3	1	3	V2823	Coffee Ranch Quarry 2	Ogalla Group	Hemphilian	yes
UCMP	K110A, K110B	1	31130	Rhinocerotidae	Aphelops	mutilis	phalanx- upper far right	phalanx	2	2	4	1	3	4	1	1	V2823	Coffee Ranch Quarry 2	Ogalla Group	Hemphilian	yes
UCMP	K110A, K110B	1	31131	Rhinocerotidae	Aphelops	mutilis	phalanx- lower left	phalanx	3	3	2	3	2	3	2	3	V2823	Coffee Ranch Quarry 2	Ogalla Group	Hemphilian	yes
UCMP	K110A, K110B	1	31132	Rhinocerotidae	Aphelops	mutilis	phalanx- lower middle	phalanx	3	3	2	1	2	3	1	1	V2823	Coffee Ranch Quarry 2	Ogalla Group	Hemphilian	yes
UCMP	K110A, K110B	1	31133	Rhinocerotidae	Aphelops	mutilis	phalanx- lower right	phalanx	3	3	4	1	3	4	1	1	V2823	Coffee Ranch Quarry 2	Ogalla Group	Hemphilian	yes
UCMP	K95A, K95B	6	30266	Rhinocerotidae	Aphelops	mutilis	6 carpals	podial	3	2	3	1	3	3	2	2	V2823	Coffee Ranch Quarry 2	Ogalla Group	Hemphilian	yes		V369-3
UCMP	K105A, K105B	1	30266	Rhinocerotidae	Aphelops	mutilis	calcaneum- left	podial	2	2	2	4	4	4	2	2	V2823	Coffee Ranch Quarry 2	Ogalla Group	Hemphilian	yes	good example of overgrowth	V369-6
UCMP	K96A, K96B	2	30266	Rhinocerotidae	Aphelops	mutilis	carpal- left	podial	2	1	3	3	2	3	1	2	V2823	Coffee Ranch Quarry 2	Ogalla Group	Hemphilian	yes		V369-3
UCMP	K94A, K94B	6	30266	Rhinocerotidae	Aphelops	mutilis	carpal- lower left	podial	3	1	3	3	3	3	1	1	V2823	Coffee Ranch Quarry 2	Ogalla Group	Hemphilian	yes		V369-3
UCMP	K95A, K95B	6	30266	Rhinocerotidae	Aphelops	mutilis	carpal- lower left	podial	3	2	1	1	2	3	1	2	V2823	Coffee Ranch Quarry 2	Ogalla Group	Hemphilian	yes		V369-3
UCMP	K95A, K95B	6	30266	Rhinocerotidae	Aphelops	mutilis	carpal- lower middle	podial	2	2	1	3	2	3	1	2	V2823	Coffee Ranch Quarry 2	Ogalla Group	Hemphilian	yes		V369-3
UCMP	K94A, K94B	6	30266	Rhinocerotidae	Aphelops	mutilis	carpal- lower right	podial	3	1	3	3	3	3	1	1	V2823	Coffee Ranch Quarry 2	Ogalla Group	Hemphilian	yes		V369-3
UCMP	K96A, K96B	2	30266	Rhinocerotidae	Aphelops	mutilis	carpal- middle	podial	3	1	3	3	2	3	3	1	V2823	Coffee Ranch Quarry 2	Ogalla Group	Hemphilian	yes		V369-3
UCMP	K96A, K96B	2	30266	Rhinocerotidae	Aphelops	mutilis	carpal- right	podial	3	1	3	3	3	4	1	1	V2823	Coffee Ranch Quarry 2	Ogalla Group	Hemphilian	yes		V369-3
UCMP	K94A, K94B	6	30266	Rhinocerotidae	Aphelops	mutilis	carpal- upper left	podial	2	2	3	1	2	3	1	1	V2823	Coffee Ranch Quarry 2	Ogalla Group	Hemphilian	yes		V369-3
UCMP	K95A, K95B	6	30266	Rhinocerotidae	Aphelops	mutilis	carpal- upper left	podial	2	2	3	3	4	3	2	1	V2823	Coffee Ranch Quarry 2	Ogalla Group	Hemphilian	yes		V369-3
UCMP	K94A, K94B	6	30266	Rhinocerotidae	Aphelops	mutilis	carpal- upper left middle	podial	2	1	1	3	3	3	1	2	V2823	Coffee Ranch Quarry 2	Ogalla Group	Hemphilian	yes		V369-3
UCMP	K95A, K95B	6	30266	Rhinocerotidae	Aphelops	mutilis	carpal- upper middle	podial	2	2	2	3	3	3	2	2	V2823	Coffee Ranch Quarry 2	Ogalla Group	Hemphilian	yes		V369-3
UCMP	K94A, K94B	6	30266	Rhinocerotidae	Aphelops	mutilis	carpal- upper right	podial	3	2	3	3	3	3	1	1	V2823	Coffee Ranch Quarry 2	Ogalla Group	Hemphilian	yes		V369-3
UCMP	K95A, K95B	6	30266	Rhinocerotidae	Aphelops	mutilis	carpal- upper right	podial	3	2	3	1	3	2	2	3	V2823	Coffee Ranch Quarry 2	Ogalla Group	Hemphilian	yes		V369-3
UCMP	K94A, K94B	6	30266	Rhinocerotidae	Aphelops	mutilis	carpal- upper right middle	podial	2	1	3	3	2	3	1	2	V2823	Coffee Ranch Quarry 2	Ogalla Group	Hemphilian	yes		V369-3
UCMP	K107A, K107B	1	30266	Rhinocerotidae	Aphelops	mutilis	tarsal- upper left	podial	2	1	4	1	2	3	1	1	V2823	Coffee Ranch Quarry 2	Ogalla Group	Hemphilian	yes	smores	V369-6
UCMP	K105A, K105B	1	30267	Rhinocerotidae	Aphelops	mutilis	calcaneium- right	podial	4	2	3	3	3	3	1	3			Ogalla Group
UCMP	K107A, K107B	1	30267	Rhinocerotidae	Aphelops	mutilis	tarsal- upper right	podial	3	2	4	3	3	3	2	1			Ogalla Group
UCMP	K107A, K107B	1	30268	Rhinocerotidae	Aphelops	mutilis	tarsal- lower left	podial	3	1	4	1	3	3	2	1			Ogalla Group
UCMP	K107A, K107B	1	30269	Rhinocerotidae	Aphelops	mutilis	tarsal- lower middle	podial	3	1	4	1	3	3	2	1			Ogalla Group
UCMP	K107A, K107B	1	30270	Rhinocerotidae	Aphelops	mutilis	tarsal- lower right	podial	3	1	4	1	3	3	2	1			Ogalla Group
UCMP	K104A, K104B	1	31124	Rhinocerotidae	Aphelops	mutilis	astragalus- left	podial	2	2	3	4	4	4	3	2	V2823	Coffee Ranch Quarry 2	Ogalla Group	Hemphilian	yes		V369-6
UCMP	K104A, K104B	1	31125	Rhinocerotidae	Aphelops	mutilis	astragalus- right	podial	3	1	2	4	3	3	3	2	V2823	Coffee Ranch Quarry 2	Ogalla Group	Hemphilian	yes
UCMP	K103A, K103B	1	31125	Rhinocerotidae	Aphelops	mutilis	calcaneum	podial	3	1	3	4	4	3	1	1	V2823	Coffee Ranch Quarry 2	Ogalla Group	Hemphilian	yes		V369-6
UCMP	K102A, K102B	1	31125	Rhinocerotidae	Aphelops	mutilis	calcaneum- top	podial	3	2	2	4	3	4	2	1	V2823	Coffee Ranch Quarry 2	Ogalla Group	Hemphilian	yes		V369-6
UCMP	K102A, K102B	1	31126	Rhinocerotidae	Aphelops	mutilis	calcaneum- lower left	podial	3	2	4	4	4	4	3	3	V2823	Coffee Ranch Quarry 2	Ogalla Group	Hemphilian
UCMP	K102A, K102B	1	31127	Rhinocerotidae	Aphelops	mutilis	calcaneum- lower middle	podial	3	1	3	2	3	3	2	3	V2823	Coffee Ranch Quarry 2	Ogalla Group	Hemphilian	yes
UCMP	K92A, K92B	2	31127	Rhinocerotidae	Aphelops	mutilis	carpal- left	podial	3	3	3	1	3	3	2	1	V2823	Coffee Ranch Quarry 2	Ogalla Group	Hemphilian	yes		V369-3
UCMP	K93A, K93B	7	31127	Rhinocerotidae	Aphelops	mutilis	carpal- lower left	podial	3	2	3	2	2	2	1	1	V2823	Coffee Ranch Quarry 2	Ogalla Group	Hemphilian	yes		V369-3
UCMP	K93A, K93B	7	31127	Rhinocerotidae	Aphelops	mutilis	carpal- lower middle	podial	3	1	3	2	3	3	1	1	V2823	Coffee Ranch Quarry 2	Ogalla Group	Hemphilian	yes		V369-3
UCMP	K93A, K93B	7	31127	Rhinocerotidae	Aphelops	mutilis	carpal- lower right	podial	3	2	3	1	1	2	1	2	V2823	Coffee Ranch Quarry 2	Ogalla Group	Hemphilian	yes		V369-3
UCMP	K92A, K92B	2	31127	Rhinocerotidae	Aphelops	mutilis	carpal- right	podial	2	1	2	3	2	3	2	2	V2823	Coffee Ranch Quarry 2	Ogalla Group	Hemphilian	yes		V369-3
UCMP	K93A, K93B	7	31127	Rhinocerotidae	Aphelops	mutilis	carpal- upper left	podial	3	2	3	2	3	3	1	1	V2823	Coffee Ranch Quarry 2	Ogalla Group	Hemphilian	yes		V369-3
UCMP	K93A, K93B	7	31127	Rhinocerotidae	Aphelops	mutilis	carpal- upper middle left	podial	2	1	3	3	3	3	1	2	V2823	Coffee Ranch Quarry 2	Ogalla Group	Hemphilian	yes		V369-3
UCMP	K93A, K93B	7	31127	Rhinocerotidae	Aphelops	mutilis	carpal- upper right	podial	3	1	1	1	1	2	1	3	V2823	Coffee Ranch Quarry 2	Ogalla Group	Hemphilian	yes		V369-3
UCMP	K93A, K93B	7	31127	Rhinocerotidae	Aphelops	mutilis	carpal- upper right middle	podial	2	1	3	3	3	3	2	2	V2823	Coffee Ranch Quarry 2	Ogalla Group	Hemphilian	yes		V369-3
UCMP	K102A, K102B	1	31128	Rhinocerotidae	Aphelops	mutilis	tarsal- lower right	podial	3	2	3	4	3	3	1	1	V2823	Coffee Ranch Quarry 2	Ogalla Group	Hemphilian
UCMP	K101A, K101B	1	32066	Rhinocerotidae	Aphelops	mutilis	podial- upper left	podial	4	3	4	3	3	4	2	1	V2823	Coffee Ranch Quarry 2	Ogalla Group	Hemphilian	yes	check	V369-6
									2.69091	1.74545	2.95455	2.53636	2.85455	3.25455	1.53398	2.26606
UO	39, 40, 41, 42, 43	1	2772	Rhinocerotidae	Teleoceras	hicksi	humerus distal	limb bone	2	1	2	3	3	2	3	3	2222	McKay Reservoir 1	Shutler	Hemphilian
UO	5, 6	1	4163	Rhinocerotidae	Teleoceras	hicksi	radius proximal	limb bone	2	1	2	2	3	4	1	3	2222	McKay Reservoir 1	Shutler	Hemphilian
UO	110, 111, 112, 113, 114, 115	1	9634	Rhinocerotidae	Teleoceras	hicksi	ulna	limb bone	2	2	2	2	3	3	1	4	2222	McKay Reservoir 1	Shutler	Hemphilian
UO	84, 85, 86, 87	1	17071	Rhinocerotidae	Teleoceras	hicksi	ulna?	limb bone	3	2	2	2	3	3	1	1	2222	McKay Reservoir 1	Shutler	Hemphilian
UO	83	1	17075	Rhinocerotidae	Teleoceras	hicksi	ulna?	limb bone	2	1	2	2	2	2	1	3	2222	McKay Reservoir 1	Shutler	Hemphilian
UO	7, 8, 9	1	49287	Rhinocerotidae	Teleoceras	hicksi	humerus distal	limb bone	1	1	2	2	3	4	1	3	2222	McKay Reservoir 1	Shutler	Hemphilian
UCMP	K173A, K173B	2	113504	Rhinocerotidae	Teleoceras	hicksi	humerus fragments	limb bone	1	1	2	1	2	3	1	4	V74163	McKay Reservoir 1	Shutler	Hemphilian
UCMP	K162A, K162B, K162C, K162D, K162E	2	113507	Rhinocerotidae	Teleoceras	hicksi	tibio-fibula	limb bone	2	2	2	1	3	4	1	3	V74163	McKay Reservoir 1	Shutler	Hemphilian
UCMP	K163A, K163B	1	113507	Rhinocerotidae	Teleoceras	hicksi	ulna fragment	limb bone	2	1	2	1	1	1	1	4	V74163	McKay Reservoir 1	Shutler	Hemphilian
UCMP	K176A, K176B	1	113518	Rhinocerotidae	Teleoceras	hicksi	tibia	limb bone	3	2	2	3	3	4	1	3	V74163	McKay Reservoir 1	Shutler	Hemphilian
UCMP	K179A, K179B	1	113519	Rhinocerotidae	Teleoceras	hicksi	distal humerus	limb bone	2	1	2	3	3	3	1	3	V74163	McKay Reservoir 1	Shutler	Hemphilian
UCMP	K178A, K178B	1	113519	Rhinocerotidae	Teleoceras	hicksi	partial ulna	limb bone	2	1	1	1	3	3	1	4	V74163	McKay Reservoir 1	Shutler	Hemphilian
UCMP	K180A, K180B	1	113519	Rhinocerotidae	Teleoceras	hicksi	proximal humerus	limb bone	1	1	2	1	2	3	1	4	V74163	McKay Reservoir 1	Shutler	Hemphilian
UCMP	K193A, K193B	1	113526	Rhinocerotidae	Teleoceras	hicksi	distal humerus	limb bone	2	2	3	3	4	3	1	4	V74163	McKay Reservoir 1	Shutler	Hemphilian
UCMP	K154A, K154B	1	303	Rhinocerotidae	Teleoceras	hicksi	metapodial	metapodial	3	3	3	1	1	2	2	2	815	JCM2	Rattlesnake	Hemphilian
UCMP	K155	1	306	Rhinocerotidae	Teleoceras	hicksi	metapodial	metapodial	2	1	3	1	1	1	2	3	815	JCM2	Rattlesnake	Hemphilian
UCMP	K161A, K161B	1	474	Rhinocerotidae	Teleoceras	hicksi	distal metapodial	metapodial	2	1	2	1	3	3	2	3	884	Mascall Misc.2	Mascall	Barstovian
UCMP	K160A, K160B	1	475	Rhinocerotidae	Teleoceras	hicksi	metapodial	metapodial	3	1	3	2	3	4	1	1	884	Mascall Misc.2	Mascall	Barstovian
UCMP	K153A, K153B	1	477	Rhinocerotidae	Teleoceras	hicksi	metapodial	metapodial	3	2	3	1	2	2	2	3	887	Birch Creek	Rattlesnake	Hemphilian
UO	103, 104	1	5056	Rhinocerotidae	Teleoceras	hicksi	metapodial	metapodial	3	2	3	2	3	3	1	2	2222	McKay Reservoir 1	Shutler	Hemphilian
UO	99, 100	1	8049	Rhinocerotidae	Teleoceras	hicksi	metapodial	metapodial	3	1	3	2	2	2	1	3	2222	McKay Reservoir 1	Shutler	Hemphilian
UO	97, 98	1	8053	Rhinocerotidae	Teleoceras	hicksi	metapodial	metapodial	3	2	3	2	2	3	1	2	2222	McKay Reservoir 1	Shutler	Hemphilian
UO	90, 91, 92, 93	1	8142	Rhinocerotidae	Teleoceras	hicksi	metapodial	metapodial	3	2	3	3	3	3	1	2	2222	McKay Reservoir 1	Shutler	Hemphilian
UCMP	K159A, K159B	1	23181	Rhinocerotidae	Teleoceras	hicksi	MC3	metapodial	3	1	3	1	3	3	1	1	3060	Rattlesnake 11	Rattlesnake	Hemphilian
UCMP	K157A, K157B	1	23182	Rhinocerotidae	Teleoceras	hicksi	MT3	metapodial	3	1	3	1	3	3	1	3	3060	Rattlesnake 11	Rattlesnake	Hemphilian
UCMP	K177A, 177B	1	113514	Rhinocerotidae	Teleoceras	hicksi	metapodial	metapodial	3	2	2	1	3	3	1	3	V74163	McKay Reservoir 1	Shutler	Hemphilian
UCMP	K167A, K167B	1	113517	Rhinocerotidae	Teleoceras	hicksi	metapodial	metapodial	3	2	3	1	1	1	1	4	V74163	McKay Reservoir 1	Shutler	Hemphilian
UCMP	K182A, K182B	1	113520	Rhinocerotidae	Teleoceras	hicksi	metapodial	metapodial	3	2	3	3	4	3	1	1	V74163	McKay Reservoir 1	Shutler	Hemphilian
UCMP	K183A, K183B	1	113521	Rhinocerotidae	Teleoceras	hicksi	metapodial	metapodial	4	2	3	2	3	3	1	1	V74163	McKay Reservoir 1	Shutler	Hemphilian
UCMP	K184A, K184B	1	113522	Rhinocerotidae	Teleoceras	hicksi	metapodial	metapodial	4	1	3	2	3	3	1	1	V74163	McKay Reservoir 1	Shutler	Hemphilian
UCMP	K185A, K185B	1	113523	Rhinocerotidae	Teleoceras	hicksi	metapodial	metapodial	4	2	3	1	3	3	1	1	V74163	McKay Reservoir 1	Shutler	Hemphilian
UCMP	K181A, K181B	1	113524	Rhinocerotidae	Teleoceras	hicksi	metapodial	metapodial	3	3	3	3	3	3	1	3	V74163	McKay Reservoir 1	Shutler	Hemphilian
UO	49, 50, 51	1	10829	Rhinocerotidae	Teleoceras	hicksi	phalanx	phalanx	4	1	4	2	2	2	1	1	2222	McKay Reservoir 1	Shutler	Hemphilian
UCMP	K171A, K171B	1	113505	Rhinocerotidae	Teleoceras	hicksi	phalanx	phalanx	2	1	2	1	1	1	1	2	V74163	McKay Reservoir 1	Shutler	Hemphilian
UCMP	K174	1	113506	Rhinocerotidae	Teleoceras	hicksi	phalanx	phalanx	3	1	3	2	1	1	1	1	V74163	McKay Reservoir 1	Shutler	Hemphilian
UCMP	K175A, 175B, 175C	1	113509	Rhinocerotidae	Teleoceras	hicksi	phalanx	phalanx	4	1	4	4	3	4	1	1	V74163	McKay Reservoir 1	Shutler	Hemphilian
UO	24, 28, 29, 30	1	2094	Rhinocerotidae	Teleoceras	hicksi	calcaneum	podial	2	1	1	2	2	2	2	1	2222	McKay Reservoir 1	Shutler	Hemphilian
UO	16, 17, 18, 19	1	4136	Rhinocerotidae	Teleoceras	hicksi	podial	podial	2	1	2	2	2	3	1	1	2222	McKay Reservoir 1	Shutler	Hemphilian
UO	13, 14, 15	1	4167	Rhinocerotidae	Teleoceras	hicksi	podial	podial	3	1	3	3	2	3	1	1	2222	McKay Reservoir 1	Shutler	Hemphilian
UO	94, 95, 96	1	8054	Rhinocerotidae	Teleoceras	hicksi	astragalus	podial	2	1	2	2	2	3	1	2	2222	McKay Reservoir 1	Shutler	Hemphilian
UO	88	1	17063	Rhinocerotidae	Teleoceras	hicksi	podial	podial	2	1	2	1	2	2	1	2	2222	McKay Reservoir 1	Shutler	Hemphilian
UO	57, 58	1	21886	Rhinocerotidae	Teleoceras	hicksi	astragalus	podial	1	1	2	1	3	3	1	1	2222	McKay Reservoir 1	Shutler	Hemphilian
UCMP	K158A, K158B	1	23178	Rhinocerotidae	Teleoceras	hicksi	Lunar	podial	2	1	1	2	2	2	1	2	3068	Rattlesnake 16	Rattlesnake	Hemphilian
UCMP	K156A, K156B	1	23179	Rhinocerotidae	Teleoceras	hicksi	calcanium	podial	2	2	1	1	1	1	1	1	3050	Rattlesnake	Rattlesnake	Hemphilian
UCMP	K169A, K169B	1	113510	Rhinocerotidae	Teleoceras	hicksi	pisiform	podial	3	2	3	1	2	3	2	2	V74163	McKay Reservoir 1	Shutler	Hemphilian
UCMP	K165A, K165B	1	113511	Rhinocerotidae	Teleoceras	hicksi	carpal	podial	2	1	3	1	2	1	1	1	V74163	McKay Reservoir 1	Shutler	Hemphilian
UCMP	K168A, K168B	1	113512	Rhinocerotidae	Teleoceras	hicksi	podial	podial	2	1	2	1	1	1	1	1	V74163	McKay Reservoir 1	Shutler	Hemphilian
UCMP	K166A, K166B	1	113513	Rhinocerotidae	Teleoceras	hicksi	podial	podial	2	1	3	1	2	2	1	1	V74163	McKay Reservoir 1	Shutler	Hemphilian
UCMP	K170A, K170B	1	113514	Rhinocerotidae	Teleoceras	hicksi	carpal	podial	2	1	2	1	1	1	1	1	V74163	McKay Reservoir 1	Shutler	Hemphilian
UCMP	K172A, K172B	1	113515	Rhinocerotidae	Teleoceras	hicksi	pisiform	podial	3	2	3	2	3	3	1	2	V74163	McKay Reservoir 1	Shutler	Hemphilian
UCMP	K164A, K164B	1	113516	Rhinocerotidae	Teleoceras	hicksi	podial	podial	3	1	3	1	2	2	1	1	V74163	McKay Reservoir 1	Shutler	Hemphilian
UCMP	K187A, K187B	1	113519	Rhinocerotidae	Teleoceras	hicksi	podial	podial	2	1	2	3	2	2	1	1	V74163	McKay Reservoir 1	Shutler	Hemphilian
UCMP	K188A, KA88B	1	113519	Rhinocerotidae	Teleoceras	hicksi	podial	podial	3	2	2	1	3	3	1	3	V74163	McKay Reservoir 1	Shutler	Hemphilian
UCMP	K189A, K189B	1	113519	Rhinocerotidae	Teleoceras	hicksi	podial	podial	2	1	2	3	2	2	1	1	V74163	McKay Reservoir 1	Shutler	Hemphilian
UCMP	K190A, KA90B	1	113519	Rhinocerotidae	Teleoceras	hicksi	podial	podial	3	1	3	3	3	3	1	1	V74163	McKay Reservoir 1	Shutler	Hemphilian
UCMP	K186A, K186B	1	113523	Rhinocerotidae	Teleoceras	hicksi	carpal	podial	3	2	3	3	3	3	1	1	V74163	McKay Reservoir 1	Shutler	Hemphilian
UO	79, 80	1	10397/ 5703	Rhinocerotidae	Teleoceras	hicksi	podial	podial	3	2	3	2	2	2	1	2	V74163	McKay Reservoir 1	Shutler	Hemphilian
UCMP	K192A, K192B	3	113519 (left)	Rhinocerotidae	Teleoceras	hicksi	podial	podial	1	1	2	1	2	3	1	1	V74163	McKay Reservoir 1	Shutler	Hemphilian
UCMP	K192A, K192B	3	113519 (midle)	Rhinocerotidae	Teleoceras	hicksi	podial	podial	3	1	3	3	3	3	1	1	V74163	McKay Reservoir 1	Shutler	Hemphilian
UCMP	K192A, K192B	3	113519 (right)	Rhinocerotidae	Teleoceras	hicksi	podial	podial	3	1	3	2	3	3	1	2	V74163	McKay Reservoir 1	Shutler	Hemphilian
UO	76	1	G1675	Rhinocerotidae	Teleoceras	hicksi	calcaneum?	podial	3	1	2	2	3	3	1	3	V74163	McKay Reservoir 1	Shutler	Hemphilian
UO	78	1	G1676	Rhinocerotidae	Teleoceras	hicksi	astragalus	podial	3	1	3	2	3	3	1	1	V74163	McKay Reservoir 1	Shutler	Hemphilian
UO	11, 12	1	4184	Rhinocerotidae	Teleoceras	hicksi	ertebrae axis body	vertebrae	2	1	1	2	3	3	3	3	2222	McKay Reservoir 1	Shutler	Hemphilian
UO	52, 53, 54, 55, 56	1	25504	Rhinocerotidae	Teleoceras	hicksi	vertebrae axis body	vertebrae	1	1	2	2	2	3	2	3	2222	McKay Reservoir 1	Shutler	Hemphilian
UO	101, 102	1	8055	Rhinocerotidae	Teleoceras	hicksi			2	1	1	1	2	2	1	3	2222	McKay Reservoir 1	Shutler	Hemphilian
									2.49231	1.36923	2.43077	1.81538	2.4	2.58462	1.16923	2.09231
AMNH	262		27757	Rhinocerotidae	Diceros	bicornis	metapodial - far left	metapodial	2	1	2	1	2	3	1	1		Kenya	N/A	Recent	yes	major cysting, slight lipping, no damage to articular surfaces
AMNH	262		27757	Rhinocerotidae	Diceros	bicornis	metapodial - second from left	metapodial	2	1	2	1	2	3	1	1		Kenya	N/A	Recent	yes	major cysting, slight lipping, no damage to articular surfaces
AMNH	262		27757	Rhinocerotidae	Diceros	bicornis	metapodial- thrid from left	metapodial	1	1	2	1	2	2	1	1		Kenya	N/A	Recent	yes	major cysting, slight lipping, no damage to articular surfaces
AMNH	262		27757	Rhinocerotidae	Diceros	bicornis	metapodial- fourth from left	metapodial	2	1	2	2	3	3	1	1		Kenya	N/A	Recent	yes	major cysting, slight lipping, no damage to articular surfaces
AMNH	262		27757	Rhinocerotidae	Diceros	bicornis	metapodial- fifth from left	metapodial	2	1	2	1	2	3	1	1		Kenya	N/A	Recent	yes	major cysting, slight lipping, no damage to articular surfaces
AMNH	262		27757	Rhinocerotidae	Diceros	bicornis	metapodial sixth from left	metapodial	1	1	2	1	2	3	1	1		Kenya	N/A	Recent	yes	major cysting, slight lipping, no damage to articular surfaces
AMNH	262		27757	Rhinocerotidae	Diceros	bicornis	metapodial- seventh from left	metapodial	2	1	2	1	2	3	1	1		Kenya	N/A	Recent	yes	major cysting, slight lipping, no damage to articular surfaces
AMNH	262		27757	Rhinocerotidae	Diceros	bicornis	metapodial- eighth from left	metapodial	2	1	2	1	2	3	1	1		Kenya	N/A	Recent	yes	major cysting, slight lipping, no damage to articular surfaces
AMNH	262		27757	Rhinocerotidae	Diceros	bicornis	metapodial- ninth from left	metapodial	2	1	2	1	2	3	1	1		Kenya	N/A	Recent	yes	major cysting, slight lipping, no damage to articular surfaces
AMNH	263, 264		27757	Rhinocerotidae	Diceros	bicornis	patella- upper	limb bone	1	1	3	1	2	2	1	1		Kenya	N/A	Recent	yes	s'mores effect, major cysting, slight lipping, no damage to articular surfaces
AMNH	263, 264		27757	Rhinocerotidae	Diceros	bicornis	patella- lower	limb bone	1	1	3	1	2	2	1	1		Kenya	N/A	Recent	yes	s'mores effect, major cysting, slight lipping, no damage to articular surfaces
AMNH	263, 264		27757	Rhinocerotidae	Diceros	bicornis	calcaneum	podial	2	2	2	1	2	2	1	1		Kenya	N/A	Recent	yes	s'mores effect, major cysting, slight lipping, no damage to articular surfaces
AMNH	263, 264		27757	Rhinocerotidae	Diceros	bicornis	podial- upper row far left	podial	2	1	2	1	3	3	1	1		Kenya	N/A	Recent	yes	s'mores effect, major cysting, slight lipping, no damage to articular surfaces
AMNH	263, 264		27757	Rhinocerotidae	Diceros	bicornis	podial- upper row second from left	podial	2	1	2	1	3	3	1	1		Kenya	N/A	Recent	yes	s'mores effect, major cysting, slight lipping, no damage to articular surfaces
AMNH	263, 264		27757	Rhinocerotidae	Diceros	bicornis	podial- upper row third from left	podial	2	1	2	1	3	3	1	1		Kenya	N/A	Recent	yes	s'mores effect, major cysting, slight lipping, no damage to articular surfaces
AMNH	263, 264		27757	Rhinocerotidae	Diceros	bicornis	podial- upper row fourth from left	podial	2	1	2	1	3	3	1	1		Kenya	N/A	Recent	yes	s'mores effect, major cysting, slight lipping, no damage to articular surfaces
AMNH	263, 264		27757	Rhinocerotidae	Diceros	bicornis	podial- upper row fifth from left	podial	2	1	2	1	3	3	1	1		Kenya	N/A	Recent	yes	s'mores effect, major cysting, slight lipping, no damage to articular surfaces
AMNH	263, 264		27757	Rhinocerotidae	Diceros	bicornis	podial- upper row seixth from left	podial	2	1	2	1	3	3	1	1		Kenya	N/A	Recent	yes	s'mores effect, major cysting, slight lipping, no damage to articular surfaces
AMNH	263, 264		27757	Rhinocerotidae	Diceros	bicornis	podial- upper row seventh from left	podial	2	1	2	1	3	3	1	1		Kenya	N/A	Recent	yes	s'mores effect, major cysting, slight lipping, no damage to articular surfaces
AMNH	263, 264		27757	Rhinocerotidae	Diceros	bicornis	podial- lower row far left	podial	2	1	2	1	3	3	1	1		Kenya	N/A	Recent	yes	s'mores effect, major cysting, slight lipping, no damage to articular surfaces
AMNH	263, 264		27757	Rhinocerotidae	Diceros	bicornis	podial- lower row second from left	podial	2	1	2	1	3	3	1	1		Kenya	N/A	Recent	yes	s'mores effect, major cysting, slight lipping, no damage to articular surfaces
AMNH	263, 264		27757	Rhinocerotidae	Diceros	bicornis	podial- lower row third from left	podial	2	1	2	1	3	3	1	1		Kenya	N/A	Recent	yes	s'mores effect, major cysting, slight lipping, no damage to articular surfaces
AMNH	263, 264		27757	Rhinocerotidae	Diceros	bicornis	podial- lower row fourth from left	podial	2	1	2	1	3	3	1	1		Kenya	N/A	Recent	yes	s'mores effect, major cysting, slight lipping, no damage to articular surfaces
AMNH	263, 264		27757	Rhinocerotidae	Diceros	bicornis	podial- lower row fifth from left	podial	2	1	2	1	3	3	1	1		Kenya	N/A	Recent	yes	s'mores effect, major cysting, slight lipping, no damage to articular surfaces
AMNH	263, 264		27757	Rhinocerotidae	Diceros	bicornis	podial- lower row sixth from left	podial	2	1	2	1	3	3	1	1		Kenya	N/A	Recent	yes	s'mores effect, major cysting, slight lipping, no damage to articular surfaces
AMNH	263, 264		27757	Rhinocerotidae	Diceros	bicornis	podial- lower row seventh from left	podial	2	1	2	1	3	3	1	1		Kenya	N/A	Recent	yes	s'mores effect, major cysting, slight lipping, no damage to articular surfaces
AMNH	265		27757	Rhinocerotidae	Diceros	bicornis	podial- upper	podial	2	1	2	1	2	2	2	1		Kenya	N/A	Recent	yes	s'mores effect, major cysting, slight lipping, no damage to articular surfaces
AMNH	265		27757	Rhinocerotidae	Diceros	bicornis	podial- lower	podial	2	1	2	1	2	2	1	1		Kenya	N/A	Recent	yes	found subsequent to first podial photo
AMNH	265		27757	Rhinocerotidae	Diceros	bicornis	pisiform	podial	2	1	2	1	3	2	1	1		Kenya	N/A	Recent	yes	found subsequent to first podial photo
AMNH	266, 267		27757	Rhinocerotidae	Diceros	bicornis	phalanx - upper row far left	phalanx	2	2	2	1	2	2	1	1		Kenya	N/A	Recent	yes	major cysting, slight lipping, no damage to articular surfaces
AMNH	266, 268		27757	Rhinocerotidae	Diceros	bicornis	phalans - upper row second from left	phalanx	2	2	3	1	2	2	1	1		Kenya	N/A	Recent	yes	major cysting, slight lipping, no damage to articular surfaces
AMNH	266, 269		27757	Rhinocerotidae	Diceros	bicornis	phalanx- upper row third from left	phalanx	2	2	3	1	2	2	1	1		Kenya	N/A	Recent	yes	major cysting, slight lipping, no damage to articular surfaces
AMNH	266, 270		27757	Rhinocerotidae	Diceros	bicornis	phalanx- upper row fourth from left	phalanx	2	1	2	1	1	1	1	1		Kenya	N/A	Recent	yes	major cysting, slight lipping, no damage to articular surfaces
AMNH	266, 271		27757	Rhinocerotidae	Diceros	bicornis	phalanx- uppr row fifth from left	phalanx	3	1	2	1	1	1	1	1		Kenya	N/A	Recent	yes	major cysting, slight lipping, no damage to articular surfaces
AMNH	266, 272		27757	Rhinocerotidae	Diceros	bicornis	phalanx- upper row sixth from left	phalanx	2	1	1	1	1	2	1	1		Kenya	N/A	Recent	yes	major cysting, slight lipping, no damage to articular surfaces
AMNH	266, 273		27757	Rhinocerotidae	Diceros	bicornis	phalanx- upper row seventh from left	phalanx	2	1	1	1	1	2	1	1		Kenya	N/A	Recent	yes	major cysting, slight lipping, no damage to articular surfaces
AMNH	266, 274		27757	Rhinocerotidae	Diceros	bicornis	phalanx- upper row eighth from left	phalanx	2	2	3	1	2	2	1	1		Kenya	N/A	Recent	yes	major cysting, slight lipping, no damage to articular surfaces
AMNH	266, 275		27757	Rhinocerotidae	Diceros	bicornis	phalanx- upper row ninth from left	phalanx	2	2	3	1	2	2	1	1		Kenya	N/A	Recent	yes	major cysting, slight lipping, no damage to articular surfaces
AMNH	266, 276		27757	Rhinocerotidae	Diceros	bicornis	phalanx - middle row far left	phalanx	2	2	2	1	2	2	1	1		Kenya	N/A	Recent	yes	major cysting, slight lipping, no damage to articular surfaces
AMNH	266, 277		27757	Rhinocerotidae	Diceros	bicornis	phalans -middle row second from left	phalanx	2	2	2	1	2	2	1	1		Kenya	N/A	Recent	yes	major cysting, slight lipping, no damage to articular surfaces
AMNH	266, 278		27757	Rhinocerotidae	Diceros	bicornis	phalanx- middle row third from left	phalanx	2	2	2	1	2	2	1	1		Kenya	N/A	Recent	yes	major cysting, slight lipping, no damage to articular surfaces
AMNH	266, 279		27757	Rhinocerotidae	Diceros	bicornis	phalanx- middle row fourth from left	phalanx	2	2	2	1	1	1	1	1		Kenya	N/A	Recent	yes	major cysting, slight lipping, no damage to articular surfaces
AMNH	266, 280		27757	Rhinocerotidae	Diceros	bicornis	phalanx- middle row fifth from left	phalanx	2	2	2	1	1	1	1	1		Kenya	N/A	Recent	yes	major cysting, slight lipping, no damage to articular surfaces
AMNH	266, 281		27757	Rhinocerotidae	Diceros	bicornis	phalanx- middle row sixth from left	phalanx	2	1	2	2	2	3	1	1		Kenya	N/A	Recent	yes	major cysting, slight lipping, no damage to articular surfaces
AMNH	266, 282		27757	Rhinocerotidae	Diceros	bicornis	phalanx- middle row seventh from left	phalanx	2	1	2	2	2	3	1	1		Kenya	N/A	Recent	yes	major cysting, slight lipping, no damage to articular surfaces
AMNH	266, 283		27757	Rhinocerotidae	Diceros	bicornis	phalanx- middle row eighth from left	phalanx	2	2	2	2	2	2	1	1		Kenya	N/A	Recent	yes	major cysting, slight lipping, no damage to articular surfaces
AMNH	266, 284		27757	Rhinocerotidae	Diceros	bicornis	phalanx- middle row ninth from left	phalanx	2	2	3	2	2	2	1	1		Kenya	N/A	Recent	yes	major cysting, slight lipping, no damage to articular surfaces
AMNH	266, 285		27757	Rhinocerotidae	Diceros	bicornis	phalanx - lower row far left	phalanx	2	2	4	1	2	2	1	1		Kenya	N/A	Recent	yes	major cysting, slight lipping, no damage to articular surfaces
AMNH	266, 286		27757	Rhinocerotidae	Diceros	bicornis	phalans -lower row second from left	phalanx	2	3	4	1	2	2	2	1		Kenya	N/A	Recent	yes	major cysting, slight lipping, no damage to articular surfaces
AMNH	266, 287		27757	Rhinocerotidae	Diceros	bicornis	phalanx- lower row third from left	phalanx	2	3	4	1	2	2	1	1		Kenya	N/A	Recent	yes	major cysting, slight lipping, no damage to articular surfaces
AMNH	266, 288		27757	Rhinocerotidae	Diceros	bicornis	phalanx- lower row fourth from left	phalanx	2	2	4	1	2	2	1	1		Kenya	N/A	Recent	yes	major cysting, slight lipping, no damage to articular surfaces
AMNH	266, 289		27757	Rhinocerotidae	Diceros	bicornis	phalanx- lower row fifth from left	phalanx	2	2	4	1	2	2	1	1		Kenya	N/A	Recent	yes	major cysting, slight lipping, no damage to articular surfaces
AMNH	266, 290		27757	Rhinocerotidae	Diceros	bicornis	phalanx- lower row sixth from left	phalanx	2	2	4	1	1	1	1	1		Kenya	N/A	Recent	yes	major cysting, slight lipping, no damage to articular surfaces
AMNH	268, 269, 270		27757	Rhinocerotidae	Diceros	bicornis	humerus	limb bone	2	1	2	2	3	3	1	1		Kenya	N/A	Recent	yes	lipping, cysting. Incomplete fusion of proximal epiphysis
AMNH	271, 272		27757	Rhinocerotidae	Diceros	bicornis	radius	limb bone	1	1	2	2	3	3	1	1		Kenya	N/A	Recent	yes	substanital lipping, large cysts, bony growths at radius-ulna articulation
AMNH	273, 274		27757	Rhinocerotidae	Diceros	bicornis	ulna	limb bone	1	1	2	1	2	3	1	1		Kenya	N/A	Recent	yes	substanital lipping, large cysts, bony growths at radius-ulna articulation
AMNH	275, 276		27757	Rhinocerotidae	Diceros	bicornis	ulna	limb bone	1	1	2	1	3	3	1	1		Kenya	N/A	Recent	yes	substanital lipping, large cysts, bony growths at radius-ulna articulation
AMNH	277, 278, 279		27757	Rhinocerotidae	Diceros	bicornis	scapula	girdle	1	1	1	1	1	1	1	1		Kenya	N/A	Recent	yes	unusual mark in center of articulation: photo'd
AMNH	280, 281		27757	Rhinocerotidae	Diceros	bicornis	femur	limb bone	1	1	1	1	2	3	2	1		Kenya	N/A	Recent	yes	unfused proximal epiphysis: indicator of age (3rd molars not completely erupted)
AMNH	282, 283		27757	Rhinocerotidae	Diceros	bicornis	tibia	limb bone	2	2	2	2	3	3	1	1		Kenya	N/A	Recent	yes	large cysting near articulations, lipping
AMNH	282, 283		27757	Rhinocerotidae	Diceros	bicornis	fibula	limb bone	3	2	3	2	3	3	1	1		Kenya	N/A	Recent	yes	large cysting near articulations, lipping
AMNH	287		81805	Rhinocerotidae	Diceros	bicornis	ulna- upper	limb bone	2	1	3	1	2	2	2	1		South Africa	N/A	Recent	yes	similar condition to 22757: lipping, cysting, slight overgrowth; ulnae with roughening in proximal articulation
AMNH	287		81805	Rhinocerotidae	Diceros	bicornis	ulna- lower	limb bone	2	1	3	1	2	2	2	1		South Africa	N/A	Recent	yes	similar condition to 22757: lipping, cysting, slight overgrowth; ulnae with roughening in proximal articulation
AMNH	288		81805	Rhinocerotidae	Diceros	bicornis	radius	limb bone	2	2	3	2	3	3	1	1		South Africa	N/A	Recent	yes	similar condition to 22757: lipping, cysting, slight overgrowth; ulnae with roughening in proximal articulation
AMNH	308, 309		81805	Rhinocerotidae	Diceros	bicornis	podial	podial	3	2	3	2	3	3	2	1		South Africa	N/A	Recent	yes	similar condition to 22757: lipping, cysting, slight overgrowth; ulnae with roughening in proximal articulation
AMNH	308, 309		81805	Rhinocerotidae	Diceros	bicornis	calcaneum	podial	1	2	3	2	3	3	1	1		South Africa	N/A	Recent	yes	similar condition to 22757: lipping, cysting, slight overgrowth; ulnae with roughening in proximal articulation
AMNH	308, 309		81805	Rhinocerotidae	Diceros	bicornis	metapodial	metapodial	2	2	3	1	2	3	1	1		South Africa	N/A	Recent	yes	similar condition to 22757: lipping, cysting, slight overgrowth; ulnae with roughening in proximal articulation
AMNH	289, 290		34739	Rhinocerotidae	Diceros	bicornis	scapula	girdle	1	1	2	1	1	2	1	1		Kenya	N/A	Recent	yes	similar condition to 22757: lipping, cysting, slight overgrowth
AMNH	291, 292, 293		34740	Rhinocerotidae	Diceros	bicornis	tibia juvenile	limb bone	1	2	1	1	2	2	1	1		Kenya	N/A	Recent	yes	juvenile: erupting 2nd molar; unfused epiphyses show strong cysting. Exemplars photo'd
AMNH	291, 292, 293		34740	Rhinocerotidae	Diceros	bicornis	metapodial juvenile	metapodial	1	1	1	1	1	2	1	1		Kenya	N/A	Recent	yes	juvenile: erupting 2nd molar; unfused epiphyses show strong cysting. Exemplars photo'd
AMNH	291, 292, 293		34740	Rhinocerotidae	Diceros	bicornis	calcaneum juvenile	podial	2	2	2	1	1	2	1	1		Kenya	N/A	Recent	yes	juvenile: erupting 2nd molar; unfused epiphyses show strong cysting. Exemplars photo'd
AMNH	294		14136	Rhinocerotidae	Diceros	bicornis	metapodial	metapodial	2	2	2	2	2	2	2	1		No Data	N/A	Recent	yes	possible zoo/circus animal. Less arthritis than wild individuals, but still prominent cysting.
AMNH	305, 306, 307		113779	Rhinocerotidae	Diceros	bicornis	femur fetal	limb bone	1	1	1	1	1	1	1	1			N/A	Recent	no	dp4 just coming into wear; very young; no arthritis
AMNH	305, 306, 307		113779	Rhinocerotidae	Diceros	bicornis	tibia fetal	limb bone	1	1	1	1	1	2	1	1			N/A	Recent	no	dp4 just coming into wear; very young; no arthritis
AMNH	305, 306, 307		113779	Rhinocerotidae	Diceros	bicornis	scapula fetal	girdle	1	1	1	1	1	2	1	1			N/A	Recent	no	dp4 just coming into wear; very young; no arthritis
									1.82667	1.4	2.22667	1.17333	2.13333	2.37333	1.09333	1
AMNH	314, 315		81892	Rhinocerotidae	Dicerorhinus	sumatrensis	metapodial- left	metapodial	2	1	2	1	1	1	1	1		Burma	N/A	Recent	yes	Old individual: lower m1 almost worn through. Photographed elements. Arthritis development much less apparent. Lipping on long bones. Calcaneum much healthier. Limb bones show more cysting than podials or metapodials
AMNH	314, 315		81892	Rhinocerotidae	Dicerorhinus	sumatrensis	metapodial- middle	metapodial	2	1	2	1	2	2	1	1		Burma	N/A	Recent	yes	Old individual: lower m1 almost worn through. Photographed elements. Arthritis development much less apparent. Lipping on long bones. Calcaneum much healthier. Limb bones show more cysting than podials or metapodials
AMNH	314, 315		81892	Rhinocerotidae	Dicerorhinus	sumatrensis	metapodial- right	metapodial	2	1	2	1	2	2	1	1		Burma	N/A	Recent	yes	Old individual: lower m1 almost worn through. Photographed elements. Arthritis development much less apparent. Lipping on long bones. Calcaneum much healthier. Limb bones show more cysting than podials or metapodials
AMNH	316, 317		81892	Rhinocerotidae	Dicerorhinus	sumatrensis	astragalus	podial	1	1	2	1	1	2	1	1		Burma	N/A	Recent	yes	Old individual: lower m1 almost worn through. Photographed elements. Arthritis development much less apparent. Lipping on long bones. Calcaneum much healthier. Limb bones show more cysting than podials or metapodials
AMNH	316, 317		81892	Rhinocerotidae	Dicerorhinus	sumatrensis	podial- upper right	podial	1	1	2	1	1	2	1	1		Burma	N/A	Recent	yes	Old individual: lower m1 almost worn through. Photographed elements. Arthritis development much less apparent. Lipping on long bones. Calcaneum much healthier. Limb bones show more cysting than podials or metapodials
AMNH	316, 317		81892	Rhinocerotidae	Dicerorhinus	sumatrensis	podial- lower left	podial	1	1	2	1	1	2	1	1		Burma	N/A	Recent	yes	Old individual: lower m1 almost worn through. Photographed elements. Arthritis development much less apparent. Lipping on long bones. Calcaneum much healthier. Limb bones show more cysting than podials or metapodials
AMNH	316, 317		81892	Rhinocerotidae	Dicerorhinus	sumatrensis	calcaneum	podial	2	1	2	1	1	1	1	1		Burma	N/A	Recent	yes	Old individual: lower m1 almost worn through. Photographed elements. Arthritis development much less apparent. Lipping on long bones. Calcaneum much healthier. Limb bones show more cysting than podials or metapodials
AMNH	318, 319		81892	Rhinocerotidae	Dicerorhinus	sumatrensis	radius	limb bone	2	1	2	1	2	2	1	1		Burma	N/A	Recent	yes	Old individual: lower m1 almost worn through. Photographed elements. Arthritis development much less apparent. Lipping on long bones. Calcaneum much healthier. Limb bones show more cysting than podials or metapodials
AMNH	318, 319		81892	Rhinocerotidae	Dicerorhinus	sumatrensis	ulna	limb bone	2	1	2	1	2	2	1	1		Burma	N/A	Recent	yes	Old individual: lower m1 almost worn through. Photographed elements. Arthritis development much less apparent. Lipping on long bones. Calcaneum much healthier. Limb bones show more cysting than podials or metapodials
AMNH	320, 321		81892	Rhinocerotidae	Dicerorhinus	sumatrensis	femur	limb bone	2	1	2	1	2	3	1	1		Burma	N/A	Recent	yes	Old individual: lower m1 almost worn through. Photographed elements. Arthritis development much less apparent. Lipping on long bones. Calcaneum much healthier. Limb bones show more cysting than podials or metapodials
AMNH	322, 323		81892	Rhinocerotidae	Dicerorhinus	sumatrensis	humerus	limb bone	2	1	2	1	3	3	1	1		Burma	N/A	Recent	yes	Old individual: lower m1 almost worn through. Photographed elements. Arthritis development much less apparent. Lipping on long bones. Calcaneum much healthier. Limb bones show more cysting than podials or metapodials
AMNH	324, 325		81892	Rhinocerotidae	Dicerorhinus	sumatrensis	tibia	limb bone	2	1	2	1	2	2	1	1		Burma	N/A	Recent	yes	Old individual: lower m1 almost worn through. Photographed elements. Arthritis development much less apparent. Lipping on long bones. Calcaneum much healthier. Limb bones show more cysting than podials or metapodials
AMNH	324, 325		81892	Rhinocerotidae	Dicerorhinus	sumatrensis	fibula	limb bone	2	2	2	1	1	1	1	1		Burma	N/A	Recent	yes	Old individual: lower m1 almost worn through. Photographed elements. Arthritis development much less apparent. Lipping on long bones. Calcaneum much healthier. Limb bones show more cysting than podials or metapodials
AMNH	326, 327		54763	Rhinocerotidae	Dicerorhinus	sumatrensis	radius	limb bone	3	2	3	1	2	3	1	1		Burma	N/A	Recent	yes	juvenile: M3 just coming into wear. Slightly more developed arthritis than 81892: more cysting, less overgrowth.
AMNH	326, 327		54763	Rhinocerotidae	Dicerorhinus	sumatrensis	ulna	limb bone	3	2	3	1	2	3	1	1		Burma	N/A	Recent	yes	juvenile: M3 just coming into wear. Slightly more developed arthritis than 81892: more cysting, less overgrowth.
AMNH	328, 329		54456	Rhinocerotidae	Rhinoceros	unicornis	metapodial- left	metapodial	2	1	2	1	2	2	1	1		India	N/A	Recent	yes	juvenile: m3 just coming into wear. Many subchondral cysts, but not much lipping. Not as badly arthritic as the African rhinos, but worse than the Sumatran rhinos.
AMNH	328, 329		54456	Rhinocerotidae	Rhinoceros	unicornis	metapodial- middle	metapodial	2	1	2	1	2	2	1	1		India	N/A	Recent	yes	juvenile: m3 just coming into wear. Many subchondral cysts, but not much lipping. Not as badly arthritic as the African rhinos, but worse than the Sumatran rhinos.
AMNH	328, 329		54456	Rhinocerotidae	Rhinoceros	unicornis	metapodial- right	metapodial	2	1	2	1	2	2	1	1		India	N/A	Recent	yes	juvenile: m3 just coming into wear. Many subchondral cysts, but not much lipping. Not as badly arthritic as the African rhinos, but worse than the Sumatran rhinos.
AMNH	330, 331		54456	Rhinocerotidae	Rhinoceros	unicornis	calcaneum	podial	2	1	2	2	2	2	1	1		India	N/A	Recent	yes	juvenile: m3 just coming into wear. Many subchondral cysts, but not much lipping. Not as badly arthritic as the African rhinos, but worse than the Sumatran rhinos.
AMNH	330, 331		54456	Rhinocerotidae	Rhinoceros	unicornis	podial- upper right	podial	2	1	2	2	2	2	1	1		India	N/A	Recent	yes	juvenile: m3 just coming into wear. Many subchondral cysts, but not much lipping. Not as badly arthritic as the African rhinos, but worse than the Sumatran rhinos.
AMNH	330, 331		54456	Rhinocerotidae	Rhinoceros	unicornis	pisiform	podial	2	1	2	2	2	2	1	1		India	N/A	Recent	yes	juvenile: m3 just coming into wear. Many subchondral cysts, but not much lipping. Not as badly arthritic as the African rhinos, but worse than the Sumatran rhinos.
AMNH	330, 331		54456	Rhinocerotidae	Rhinoceros	unicornis	astragalus	podial	2	1	2	2	2	2	1	1		India	N/A	Recent	yes	juvenile: m3 just coming into wear. Many subchondral cysts, but not much lipping. Not as badly arthritic as the African rhinos, but worse than the Sumatran rhinos.
AMNH	333, 334		54456	Rhinocerotidae	Rhinoceros	unicornis	femur	limb bone	1	1	2	2	2	2	1	1		India	N/A	Recent	yes	juvenile: m3 just coming into wear. Many subchondral cysts, but not much lipping. Not as badly arthritic as the African rhinos, but worse than the Sumatran rhinos.
AMNH	335, 336		54456	Rhinocerotidae	Rhinoceros	unicornis	ulna- upper	limb bone	2	1	3	2	3	4	3	1		India	N/A	Recent	yes	juvenile: m3 just coming into wear. Many subchondral cysts, but not much lipping. Not as badly arthritic as the African rhinos, but worse than the Sumatran rhinos.
AMNH	335, 336		54456	Rhinocerotidae	Rhinoceros	unicornis	ulna- lower	limb bone	2	1	3	2	3	4	3	1		India	N/A	Recent	yes	juvenile: m3 just coming into wear. Many subchondral cysts, but not much lipping. Not as badly arthritic as the African rhinos, but worse than the Sumatran rhinos.
AMNH	337, 338		54456	Rhinocerotidae	Rhinoceros	unicornis	radius	limb bone	2	1	3	2	3	3	1	1		India	N/A	Recent	yes	juvenile: m3 just coming into wear. Many subchondral cysts, but not much lipping. Not as badly arthritic as the African rhinos, but worse than the Sumatran rhinos.
AMNH	339, 340, 341		54456	Rhinocerotidae	Rhinoceros	unicornis	tibia	limb bone	2	1	1	1	2	2	1	1		India	N/A	Recent	yes	juvenile: m3 just coming into wear. Many subchondral cysts, but not much lipping. Not as badly arthritic as the African rhinos, but worse than the Sumatran rhinos.
AMNH	339, 340, 341		54456	Rhinocerotidae	Rhinoceros	unicornis	fibula	limb bone	2	1	2	1	2	2	1	1		India	N/A	Recent	yes	juvenile: m3 just coming into wear. Many subchondral cysts, but not much lipping. Not as badly arthritic as the African rhinos, but worse than the Sumatran rhinos.
AMNH	342, 343		54456	Rhinocerotidae	Rhinoceros	unicornis	humerus	limb bone	3	1	3	2	3	3	1	1		India	N/A	Recent	yes	juvenile: m3 just coming into wear. Many subchondral cysts, but not much lipping. Not as badly arthritic as the African rhinos, but worse than the Sumatran rhinos.
AMNH	344, 345		70445	Rhinocerotidae	Rhinoceros	unicornis	calcaneum	podial	1	1	1	1	2	2	1	1		India	N/A	Recent	no	juvenile; m1 fully erupted, m2 formed but unerupted. Almost no arthritic development. Photograph of partially formed astragalus.
AMNH	346, 347		274636	Rhinocerotidae	Rhinoceros	unicornis	calcaneum juvenile	podial	1	1	1	1	1	2	1	1		Zoo Specimen	N/A	Recent	no	neonate: no teeth in wear, just erupting. No arthritic development.

## Sheet: Averages
		Exostoses	Lipping	Abnormal Bone Texture	Cavitation	Foramen Shape	Foramen Size Var.	Articular Surface	Taphonomy
Hyrachyus	eximius	1.35273	1.11273	1.35636	1.18545	1.32364	1.39636	1.06909	2.12
Trigonias	osborni	1.89474	1.33333	2	1.34211	1.57895	1.7193	1.19298	1.66667
Menoceras	arikarense	2.18072	1.37349	2.15663	1.77108	2.01205	2.50602	1.31325	2.91566
Diceratherium	niobrarense?	2.09722	1.61111	2.375	1.69444	1.84722	1.875	1.30556	2.84722
Aphelops	mutilis	2.69091	1.74545	2.95455	2.53636	2.85455	3.25455	1.53398	2.26606
Teleoceras	hicksi	2.49231	1.36923	2.43077	1.81538	2.4	2.58462	1.16923	2.09231
Diceros	bicornis	1.82667	1.4	2.22667	1.17333	2.13333	2.37333	1.09333	1

## Sheet: NISP
		NISP
Hyrachyus	eximius	275
Trigonias	osborni	114
Menoceras	arikarense	83
Diceratherium	niobrarense?	72
Aphelops	mutilis	110
Teleoceras	hicksi	65
Diceros	bicornis	75
